# Supplementary material
Source: publisher figshare collection journal article supplement (https://acs.figshare.com/ndownloader/files/6488031)
Supplement: Supplementary file 1 [file 6488031]

## **Supporting Information**

### **Effect of Biodiesel Fuels on Real-World Emissions of Passenger Locomotives**

Brandon M. Graver, H. Christopher Frey\*, and Jiangchuan Hu  
Department of Civil, Construction, and Environmental Engineering, North Carolina State  
University, Campus Box 7908, Raleigh, NC 27695-7908, Email: frey@ncsu.edu, Phone: (919)  
515-1155, Fax: (919) 515-7908

59 pages, 13 tables, 15 figures

The supporting information include: (1) specifications of each locomotive model owned by the North Carolina Department of Transportation (NCDOT); (2) the Piedmont passenger rail service route map; (3) the average observed travel duration between rail stations on the Piedmont; (4) a discussion of the PEMS precision, accuracy, and calibration; (5) photographs of the installation of the PEMS on the prime mover engine (PME); (6) equations used to estimate locomotive fuel use and emission rates; (7) a discussion on the estimation of the PME volumetric efficiency based on dynamometer measurements; (8) notch average rail yard (RY) and over-the-rail (OTR) engine parameters and engine output-based emission rates for each locomotive; (9) cycle average RY and OTR engine output-based emission rates for each locomotive; and (10) lubrication oil analysis results.

## Locomotive Specifications

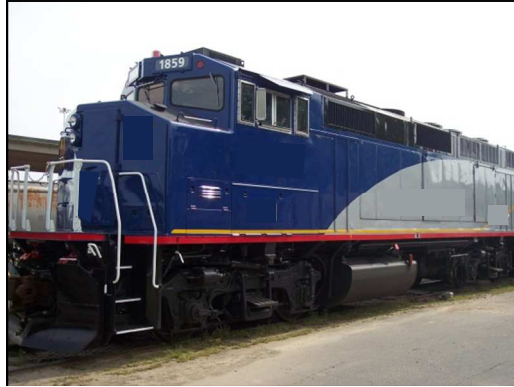

|                                                         |                                               |
|---------------------------------------------------------|-----------------------------------------------|
| <b>Model Designation .....</b>                          | <b>F59PH</b>                                  |
| <b>Number Currently in NCDOT Locomotive Fleet .....</b> | <b>4</b>                                      |
| <b>Prime Mover Diesel Engine.....</b>                   | <b>EMD</b>                                    |
| Model .....                                             | 12N-710G3                                     |
| Type .....                                              | Turbocharged                                  |
| Total Displacement .....                                | 139.6 L (8,520 in <sup>3</sup> )              |
| Number of Cylinders.....                                | 12                                            |
| Cylinder Arrangement .....                              | 45° “V”                                       |
| Compression Ratio.....                                  | 16:1                                          |
| Displacement per Cylinder .....                         | 11,635 cm <sup>3</sup> (710 in <sup>3</sup> ) |
| Cylinder Bore.....                                      | 230.19 mm (9.06 in)                           |
| Cylinder Stroke .....                                   | 279.4 mm (11.0 in)                            |
| Operating Principle .....                               | 2 Stroke Cycle                                |
| Rotation (Facing Flywheel End).....                     | Counterclockwise                              |
| Full Speed .....                                        | 904 RPM                                       |
| Normal Idle Speed .....                                 | 343 RPM                                       |
| Low Idle Speed .....                                    | 200 RPM                                       |
| Weight.....                                             | 13,700 kg (30,200 lbs)                        |

### **Speed and Performance Data**

|                                                             |                        |
|-------------------------------------------------------------|------------------------|
| Maximum Speed based on Rated Speed of Traction Motors ..... | 83 mph                 |
| Overspeed Alarm and Penalty Setting .....                   | 80 mph                 |
| Tractive Effort (Stall).....                                | 29,300 kg (64,500 lbs) |
| Tractive Effort (Continuous).....                           | 19,100 kg (42,000 lbs) |
| Peak Dynamic Brake Effort .....                             | 12,100 kg (26,750 lbs) |

### **Major Dimensions**

|                             |                                       |
|-----------------------------|---------------------------------------|
| Maximum Length.....         | 17.72 m (58 ft, 2 in)                 |
| Maximum Width.....          | 3.20 m (10 ft, 6 in)                  |
| Maximum Height.....         | 4.81 m (15 ft, 8.19 in)               |
| Loaded Weight on Rail ..... | 118,000 kg (260,000 lbs)              |
| Fuel Tank Capacity .....    | 6,820 to 8,410 L (1,500 to 1,850 gal) |

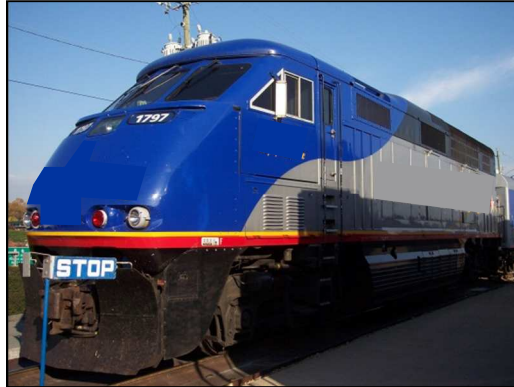

**Model Designation ..... F59PHI**  
**Number Currently in NCDOT Locomotive Fleet .....2**  
**Prime Mover Diesel Engine..... EMD**  
 Model ..... 12N-710G3B-EC  
 Type ..... Turbocharged  
 Total Displacement ..... 139.6 L (8,520 in<sup>3</sup>)  
 Number of Cylinders.....12  
 Cylinder Arrangement ..... 45° “V”  
 Compression Ratio..... 16:1  
 Displacement per Cylinder ..... 11,635 cm<sup>3</sup> (710 in<sup>3</sup>)  
 Cylinder Bore.....230.19 mm (9.06 in)  
 Cylinder Stroke .....279.4 mm (11.0 in)  
 Operating Principle ..... 2 Stroke Cycle  
 Rotation (Facing Flywheel End).....Counterclockwise  
 Full Speed ..... 904 RPM  
 Normal Idle Speed ..... 343 RPM  
 Low Idle Speed ..... 200 RPM  
 Weight..... 13,700 kg (30,200 lbs)

### **Speed and Performance Data**

|                                                             |                        |
|-------------------------------------------------------------|------------------------|
| Maximum Speed based on Rated Speed of Traction Motors ..... | 110 mph                |
| Overspeed Alarm and Penalty Setting .....                   | 83 mph                 |
| Tractive Effort (Stall).....                                | 29,300 kg (64,500 lbs) |
| Tractive Effort (Continuous).....                           | 19,100 kg (42,000 lbs) |
| Peak Dynamic Brake Effort .....                             | 12,100 kg (26,750 lbs) |

### **Major Dimensions**

|                             |                          |
|-----------------------------|--------------------------|
| Maximum Length.....         | 17.9 m (58 ft, 7 in)     |
| Maximum Width.....          | 3.2 m (10 ft, 7.5 in)    |
| Maximum Height.....         | 4.9 m (15 ft, 11.75 in)  |
| Loaded Weight on Rail ..... | 124,250 kg (270,000 lbs) |
| Fuel Tank Capacity .....    | 8,200 L (1,800 gal)      |

## Piedmont Route Map and Timetable

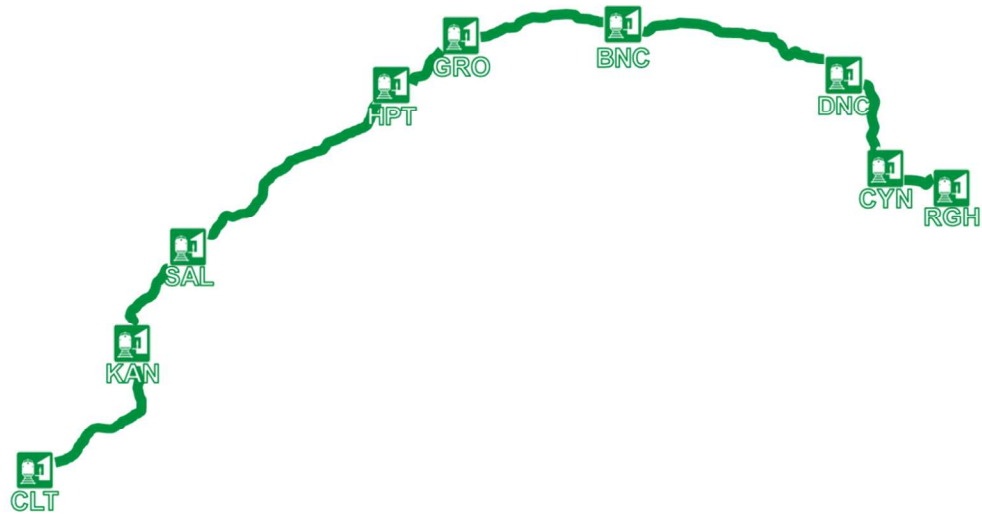

**Figure S1. Route map of the North Carolina AMTRAK Piedmont passenger rail service.**

**Table S1. North Carolina AMTRAK Piedmont Passenger Rail Service Average Observed Duration of Travel between Rail Stations**

(a) Southbound Trains

| Station          | Average Observed Travel Time (min) |
|------------------|------------------------------------|
| Raleigh (RGH)    | ---                                |
| Cary (CYN)       | 11                                 |
| Durham (DNC)     | 21                                 |
| Burlington (BNC) | 40                                 |
| Greensboro (GRO) | 22                                 |
| High Point (HPT) | 20                                 |
| Salisbury (SAL)  | 35                                 |
| Kannapolis (KAN) | 17                                 |
| Charlotte (CLT)  | 26                                 |

(b) Northbound Trains

| Station          | Average Observed Travel Time (min) |
|------------------|------------------------------------|
| Charlotte (CLT)  | ---                                |
| Kannapolis (KAN) | 26                                 |
| Salisbury (SAL)  | 16                                 |
| High Point (HPT) | 35                                 |
| Greensboro (GRO) | 17                                 |
| Burlington (BNC) | 24                                 |
| Durham (DNC)     | 38                                 |
| Cary (CYN)       | 21                                 |
| Raleigh (RGH)    | 14                                 |

## PEMS Precision, Accuracy, and Calibration

The PEMS used here are the OEM-2100 Montana and OEM-2100AX Axion systems, manufactured by Clean Air Technologies International, Inc. These PEMS are comprised of two parallel five-gas analyzers, a particulate matter (PM) measurement system, and engine sensor array, a global positioning system (GPS), and an on-board computer (1, 2).

The two parallel gas analyzers simultaneously measure the volume percentage of carbon monoxide (CO), carbon dioxide (CO<sub>2</sub>), hydrocarbons (HC), nitric oxide (NO), and oxygen (O<sub>2</sub>) in the vehicle exhaust. HC, CO, and CO<sub>2</sub> are measured using non-dispersive infrared (NDIR). The accuracy for CO and CO<sub>2</sub> are excellent. The accuracy of the HC measurement depends on the type of fuel used (3, 4). NO is measured using an electrochemical cell. Nitrogen oxides (NO<sub>x</sub>) is typically comprised of approximately 95 volume percent NO; therefore, NO emissions converted to an equivalent NO<sub>2</sub> mass basis (using the molecular weight of NO<sub>2</sub>) are a good indicator of total NO<sub>x</sub> emissions. NO<sub>x</sub> emissions are typically reported as equivalent NO<sub>2</sub>. Prior to each set of measurements, the PEMS was calibrated with a California Bureau of Automotive Repair (BAR) certified calibration gas (BAR-97 Low). Each PEMS gas analyzer was re-calibrated using ambient air to “zero” values every 15 minutes on a staggered schedule, so that typically at least one gas analyzer was measuring while the other was “zeroing.”

The PEMS reports the mass emission rates estimated using concentration and engine data as detailed elsewhere (3, 5-6). The precision of this PEMS is  $\pm 25$  ppm,  $\pm 4$  ppm,  $\pm 0.02\%$ , and  $\pm 0.3\%$  for NO, HC, CO and CO<sub>2</sub>, respectively (7). Comparison of the PEMS with a dynamometer laboratory shows that the Montana system has good precision and accuracy (3, 8). For example, the Montana system has been evaluated in the Environmental Technology Verification (ETV) program of the U.S. EPA. In an independent study by Battelle, emissions of several vehicles were measured simultaneously on a laboratory grade dynamometer facility and with the PEMS (8). The coefficients of determination ( $R^2$ ) for the comparison for exceeded 0.86 for all pollutants, indicating good precision. The slopes of the parity plots for CO, CO<sub>2</sub> and NO ranged from 0.92 to 1.05, indicating good accuracy. NDIR is well known to respond only partially to the total loading of hydrocarbon species in the exhaust, because it responds well to alkanes but is less responsive for other types of S-3 compounds, such as aromatics (9-11).

Correction factors are used to adjust for biases associated with the PEMS emissions measurement methods. As noted earlier, NO<sub>x</sub> is typically comprised of 90 to 95% NO by volume. A correction factor of 1.053 (1/0.95) is used to approximate for total NO<sub>x</sub>, based on 95% NO in NO<sub>x</sub>. If the actual share of NO in NO<sub>x</sub> is slightly lower (e.g., by 5%), the estimate of total NO<sub>x</sub> will be slightly low (e.g. by approximately 5%). The overall response to NDIR to a mixture of hydrocarbons in engine exhaust is approximately 23% to 68% of the actual total HC (10). A correction factor of 2.5 is used to approximate for total HC. An evaluation of the laser light scattering technique for measuring PM showed as much as an 80% difference in the emission measurement relative to the FRM (12). Thus, the PM emission rates are based on a correction factor of 5 to approximate total PM.

## **PEMS Calibration Accuracy Check Procedure**

1. Inspect all portable emissions measurement system (PEMS) pumps for proper vacuum.
2. Clean the non-dispersive infrared (NDIR) chambers for both PEMS benches.
3. Warm up the PEMS for a minimum of sixty (60) minutes.
4. Calibrate both PEMS benches using BAR-97 LOW calibration gas.
5. Once calibration is complete, allow PEMS to run for ten (10) minutes to allow complete purging of system.
6. Run BAR-97 LOW calibration gas through system for two (2) minutes.
7. Allow PEMS to run for ten (10) minutes to allow complete purging of system.
8. Run BAR-97 HIGH calibration gas through system for two (2) minutes.
9. Allow PEMS to run for ten (10) minutes to allow complete purging of system.
10. Calibrate both PEMS benches using BAR-97 HIGH calibration gas.
11. Once calibration is complete, allow PEMS to run for ten (10) minutes to allow complete purging of system.
12. Run BAR-97 HIGH calibration gas through system for two (2) minutes.
13. Allow PEMS to run for ten (10) minutes to allow complete purging of system.
14. Run BAR-97 LOW calibration gas through system for two (2) minutes.
15. Allow PEMS to run for ten (10) minutes to allow complete purging of system.
16. Download the PEMS data and calculate average concentrations of each gas compound during Steps 6, 8, 12, and 14. Calculate the difference in measured average concentrations from calibration gas certification concentrations.



**Table S2. PEMS Calibration Accuracy Check Results**

(a) Calibration with BAR-97 Low, Bench Reading with BAR-97 Low

| Compound            | Low Gas Certification | Bench A Reading | Bench B Reading | Average of Benches A and B |
|---------------------|-----------------------|-----------------|-----------------|----------------------------|
| HC (ppm)            | 198                   | 182 (-8.1%)     | 191 (-3.5%)     | 187 (-5.6%)                |
| CO (%)              | 0.50                  | 0.48 (-4.0%)    | 0.50 (0.0%)     | 0.49 (-2.0%)               |
| CO <sub>2</sub> (%) | 6.0                   | 5.86 (-2.3%)    | 5.99 (-0.2%)    | 5.93 (-1.2%)               |
| NO (ppm)            | 299                   | 298 (-0.3%)     | 300 (+0.3%)     | 299 (0.0%)                 |

(b) Calibration with BAR-97 Low, Bench Reading with BAR-97 High

| Compound            | High Gas Certification | Bench A Reading | Bench B Reading | Average of Benches A and B |
|---------------------|------------------------|-----------------|-----------------|----------------------------|
| HC (ppm)            | 3212                   | 3044 (-5.2%)    | 3114 (-3.1%)    | 3079 (-4.1%)               |
| CO (%)              | 7.96                   | 7.78 (-2.3%)    | 8.06 (+1.3%)    | 7.92 (-0.5%)               |
| CO <sub>2</sub> (%) | 12.20                  | 12.33 (+1.1%)   | 12.07 (-1.1%)   | 12.20 (0.0%)               |
| NO (ppm)            | 3020                   | 3141 (+4.0%)    | 3164 (+4.8%)    | 3153 (+4.4%)               |

(c) Calibration with BAR-97 High, Bench Reading with BAR-97 High

| Compound            | High Gas Certification | Bench A Reading | Bench B Reading | Average of Benches A and B |
|---------------------|------------------------|-----------------|-----------------|----------------------------|
| HC (ppm)            | 3212                   | 3180 (-1.0%)    | 3184 (-0.9%)    | 3182 (-0.9%)               |
| CO (%)              | 7.96                   | 7.85 (-1.4%)    | 8.00 (+0.5%)    | 7.93 (-0.4%)               |
| CO <sub>2</sub> (%) | 12.20                  | 12.10 (-0.8%)   | 12.20 (0.0%)    | 12.15 (-0.4%)              |
| NO (ppm)            | 3020                   | 3024 (+0.1%)    | 3021 (0.0%)     | 3023 (+0.1%)               |

(d) Calibration with BAR-97 High, Bench Reading with BAR-97 Low

| Compound            | Low Gas Certification | Bench A Reading | Bench B Reading | Average of Benches A and B |
|---------------------|-----------------------|-----------------|-----------------|----------------------------|
| HC (ppm)            | 198                   | 191 (-3.5%)     | 196 (-1.0%)     | 194 (-2.0%)                |
| CO (%)              | 0.50                  | 0.48 (-4.0%)    | 0.50 (0.0%)     | 0.49 (-2.0%)               |
| CO <sub>2</sub> (%) | 6.0                   | 5.76 (-4.0%)    | 6.04 (+0.7%)    | 5.90 (-1.7%)               |
| NO (ppm)            | 299                   | 287 (-4.0%)     | 286 (-4.3%)     | 287 (-4.0%)                |

## PEMS Installation

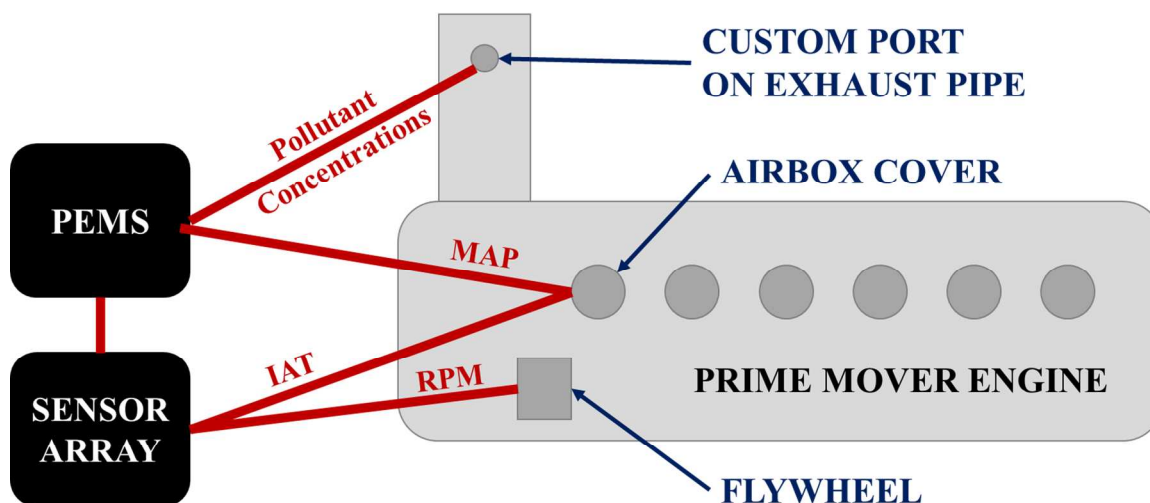

Figure S2. Diagram of PEMS Setup on Locomotive Prime Mover Engine

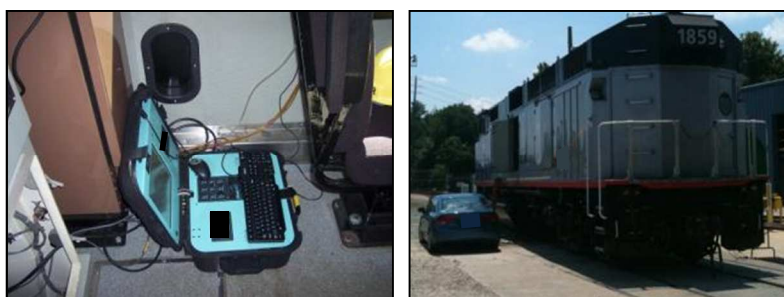

Figure S3. PEMS Placement for F59PH Locomotive Prime Mover Engine Measurement  
(a) inside of the locomotive cab; (b) inside an air conditioned vehicle during extreme heat

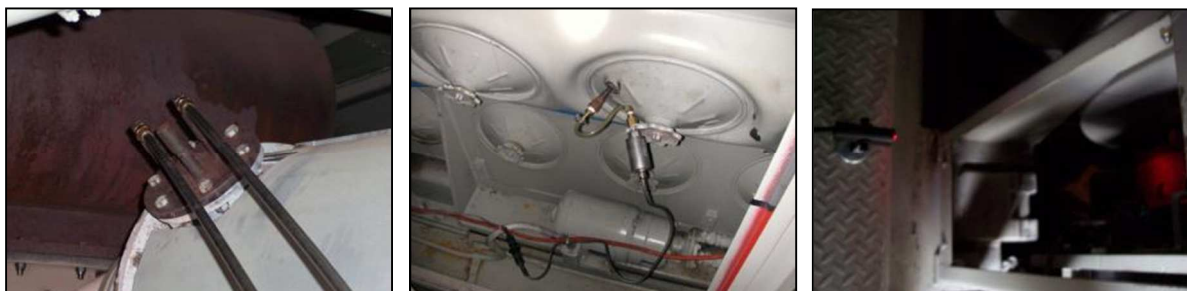

Figure S4. Installation of Sensors on an F59PH Locomotive Prime Mover Engine  
(a) exhaust sampling port and metal tubes; (b) manifold absolute pressure (MAP) sensor; (c) RPM sensor

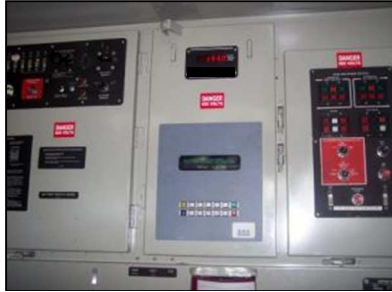

**Figure S5. Prime Mover Engine Activity Digital Display in F59PH Locomotive Cab**

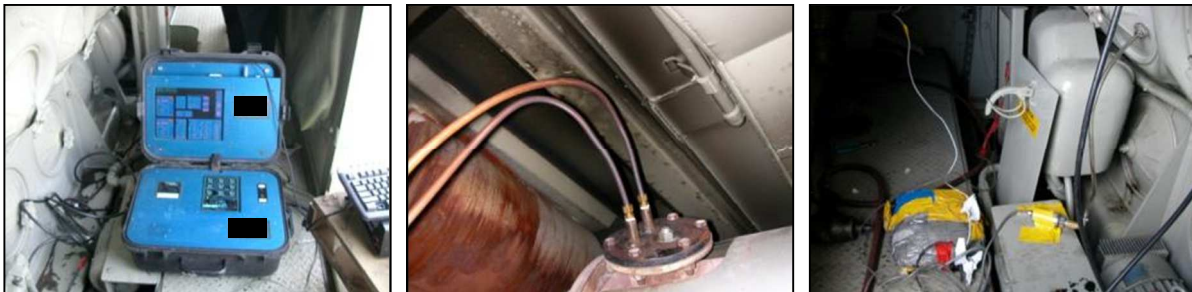

**Figure S6. Installation of PEMS on an F59PH Locomotive Prime Mover Engine**  
*(a) PEMS main unit (front-view); (b) exhaust sampling port and metal tubes; (c) sensor array box*

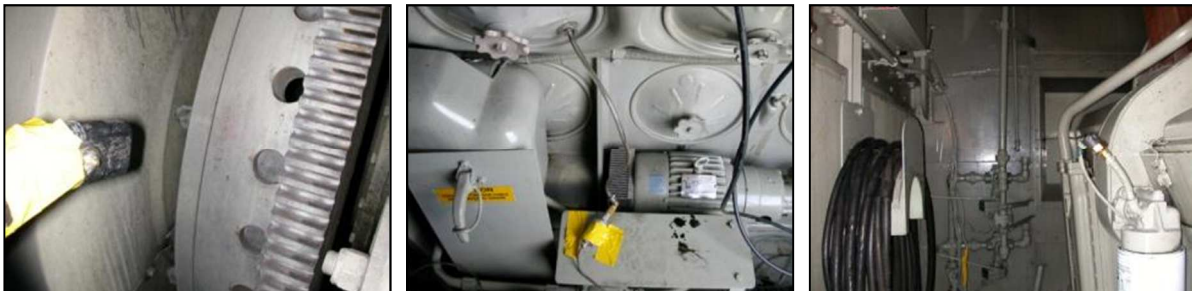

**Figure S7. Installation of Sensors on an F59PH Locomotive Prime Mover Engine**  
*(a) RPM sensor; (b) manifold absolute pressure (MAP) sensor; (c) intake air temperature (IAT) sensor*

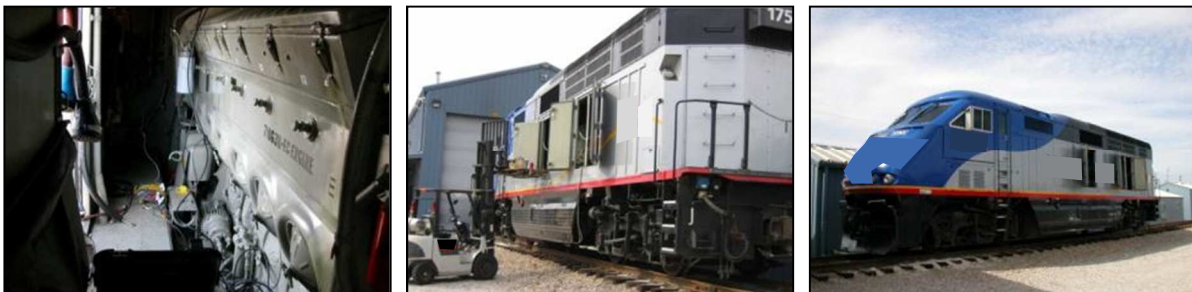

**Figure S8. Installation of PEMS Exhaust Sample Lines in an F59PH Locomotive**  
*(a) routing sampling hoses and cables; (b) routing sampling hoses through a side door, secured with ties (rear-view); (c) side-view of F59PH locomotive*

## Estimation of Fuel Use and Emission Rates

Fuel-based emission rates are estimated based on exhaust gas and fuel compositions, independent of fuel flow rate data. This is due to the inability to accurately measure fuel use during rail yard and over-the-rail measurements, since fuel is taken from a large on-board tank and locomotive engines continuously return unspent fuel to the tank. The intake air molar flow rate ( $M_a$ ) is estimated based on engine data, including engine RPM, manifold absolute pressure (MAP), intake air temperature (IAT), engine displacement, engine compression ratio, and engine volumetric efficiency. This is known as the “speed density” method (13), and is widely used to estimate air flow through an engine. The intake air molar flow rate is calculated as:

$$M_a = \frac{(P_M - \frac{P_B}{ER}) \times EV \times (\frac{ES}{30 \times EC}) \times \eta_{ev}}{R \times (T_{int} + 273.15)} \quad (S1)$$

Where,

- $EC$  = engine strokes per cycle (assumption: 2 for prime mover engine)
- $ER$  = engine compression ratio
- $ES$  = engine speed (RPM)
- $EV$  = engine displacement (L)
- $M_a$  = intake air molar flow rate (mole/sec)  
(assumption: air to be a mixture of 21 vol-% O<sub>2</sub> and 79 vol-% N<sub>2</sub>)
- $P_B$  = barometric pressure (assumption: 101 kPa)
- $P_M$  = engine manifold absolute pressure (kPa)
- $T_{int}$  = intake air temperature (°C)
- $\eta_{ev}$  = engine volumetric efficiency

The exhaust molar flow rate on a dry basis ( $M_e$ ) is needed to estimate the mass of pollutants in the exhaust, and is estimated based on the intake air molar flow rate ( $M_a$ ) and the air-to-fuel ratio inferred from the exhaust gas composition. The relation between  $M_e$  and  $M_a$  is as follows:

$$M_{e,t} = \frac{2 \times 0.21 \times M_{a,t}}{(2 + \frac{x}{2} - z) y_{CO_2,t,dry} + (1 + \frac{x}{2} - z) y_{CO,t,dry} + 2y_{O_2,t,dry} + y_{NO,t,dry} + (3x - 7 - 6z) y_{C_6H_{14},t,dry}} \quad (S2)$$

Where,

- $M_{e,t}$  = dry exhaust molar flow rate for time  $t$  (mole/sec)
- $y_{i,t,dry}$  = mole fraction of pollutant species  $i$  on a dry basis for time  $t$  (gmol/gmol dry exhaust gases)
- $x, z$  = elemental composition of fuel CH<sub>x</sub>O<sub>z</sub> (gmol of H or O, respectively, per gmol of carbon in the fuel)

For each second, the PEMS estimates mass emission rates (g/sec) based upon the mole fraction on a dry basis, dry exhaust molar flow rate, and molar weight of exhaust gas as follows:

$$E_{i,t} = y_{i,t,dry} \times M_{e,t} \times MW_i \quad (S3)$$

Where,

- $E_{i,t}$  = mass emission rate of pollutant species  $i$  (g/sec)
- $MW_i$  = molecular weight of pollutant species  $i$  (g/mol)

Fuel-based emission factors are calculated based on the exhaust gas and fuel composition. The key concept of these emission factors is that the exhaust composition accounts for all of the carbon contained in the fuel, which is emitted as CO<sub>2</sub>, CO, and HC. From the mole fractions of these three exhaust components, the fraction of carbon in the fuel emitted as CO<sub>2</sub> is estimated. Therefore, the conversion of carbon in the fuel to CO<sub>2</sub> per gallon of fuel consumed can be estimated, since the weight percent of carbon in the fuel is known. Molar ratios of NO to CO<sub>2</sub> and HC to CO<sub>2</sub> are used to estimate the amount of NO and HC, respectively, emitted per gallon of fuel consumed. Since the PEMS gas analyzer is calibrated based on propane as an indicator of HC, propane is used as the basis for characterizing the properties of the hydrocarbons. Since propane has 3 moles of carbon atoms per mole of molecules, the HC mole fraction is multiplied by 3 to estimate the amount of carbon contained in the HC. The fraction of carbon emitted as CO<sub>2</sub> is estimated as:

$$f_c = \frac{y_{CO_2}}{y_{CO_2} + y_{CO} + 3 y_{HC}} \quad (S4)$$

Where,

$$\begin{aligned} f_c &= \text{fraction of carbon as CO}_2 \text{ in exhaust (gmol C as CO}_2\text{/total gmol of C)} \\ y_i &= \text{mole fraction of specie } i \text{ (gmol of specie } i\text{/gmol of mixture of all species)} \end{aligned}$$

The carbon density of fuel is estimated based on the weight percent of carbon in the fuel and the fuel density:

$$\rho_c = \rho_f p_c \quad (S5)$$

Where,

$$\begin{aligned} p_c &= \text{weight proportion of carbon in fuel (g C/g fuel)} \\ \rho_c &= \text{carbon density of fuel (g C/gallon of fuel)} \\ \rho_f &= \text{density of fuel (g fuel/gallon of fuel)} \end{aligned}$$

The fuel-based CO<sub>2</sub> emission factor ( $EF_f^{CO_2}$ ) is:

$$EF_{CO_2}^f = 44 f_c \left( \frac{\rho_c}{12} \right) \quad (S6)$$

The fuel-based NO emission factor ( $EF_f^{NO}$ ) is:

$$EF_{NO_x}^f = \left( \frac{y_{NO}}{y_{CO_2}} \right) \left( \frac{46}{44} \right) EF_{CO_2}^f \quad (S7)$$

The fuel-based CO emission factor ( $EF_f^{CO}$ ) is:

$$EF_{CO}^f = \left( \frac{y_{CO}}{y_{CO_2}} \right) \left( \frac{28}{44} \right) EF_{CO_2}^f \quad (S8)$$

The fuel-based HC emission factor ( $EF_f^{HC}$ ) is:

$$EF_{HC}^f = \left( \frac{y_{HC}}{y_{CO_2}} \right) \left( \frac{42}{44} \right) EF_{CO_2}^f \quad (S9)$$

For particulate matter, the gas analyzer reports a mass per volume concentration in units of  $\text{mg/m}^3$  on a dry basis. Therefore, an estimate is needed of the exhaust flow in dry  $\text{m}^3$  per gallon of fuel consumed in order to calculate an emission rate of PM in units of mass per gallon of fuel consumed. The fuel-based PM emission rate is calculated based on the an air-to-fuel ratio that is calculated based on fuel properties and the observed mole fraction of  $\text{CO}_2$  in the exhaust.

Complete combustion of fuel with excess air is represented as the following mass balance:

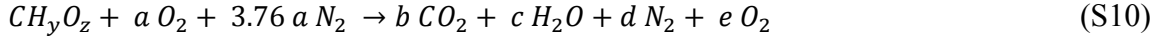

From the fuel properties, the values of  $y$  (gmol H/gmol C) and  $z$  (gmol O/gmol C) are known. From the exhaust measurements, the mole fraction of  $\text{CO}_2$ , on a dry basis, is known. Thus, the unknowns are  $a$  (inlet gmol  $\text{O}_2$ /gmol C),  $b$  (gmol  $\text{CO}_2$ /gmol C),  $c$  (gmol  $\text{H}_2\text{O}$ /gmol C),  $d$  (gmol  $\text{N}_2$ /gmol C), and  $e$  (exhaust gmol  $\text{O}_2$ /gmol C). These can be calculated using a system of equations based on elemental mass balances and the observed mole fraction of  $\text{CO}_2$ :

| Description                                | Equation                         | Re-arranged Equation                                     |
|--------------------------------------------|----------------------------------|----------------------------------------------------------|
| Atom balance for C                         | $1 = b$                          | $b = 1$                                                  |
| Atom balance for H                         | $y = 2c$                         | $c = y/2$                                                |
| Atom balance for O                         | $2a + z = 2b + c + 2e$           | $a = b + c/2 + e - z/2$                                  |
| Atom balance for N                         | $3.76(2)a = 2d$                  | $d = 3.76a$                                              |
| Mole Fraction of $\text{CO}_2$ , dry basis | $y_{CO_2} = \frac{b}{b + d + e}$ | $e = b \left( \frac{1 - y_{CO_2}}{y_{CO_2}} \right) - d$ |

Substituting into the equation for  $a$  (inlet gmol  $\text{O}_2$ /gmol C):

$$a = \left( \frac{1}{4.76} \right) \left\{ b \left[ 1 + \left( \frac{1 - y_{CO_2}}{y_{CO_2}} \right) \right] + \frac{y}{4} - \frac{z}{2} \right\} \quad (\text{S11})$$

Hence,  $a$  can be solved by knowing values for  $y$  and  $z$  from the fuel properties and based on the observed mole fraction (dry basis) for  $\text{CO}_2$ .

The air-to-fuel ratio (g air/g fuel) is estimated as:

$$\left( \frac{m_a}{m_f} \right) = \frac{32a + 28(3.76)a}{MW_f} = 137.28 \frac{a}{MW_f} \quad (\text{S12})$$

Specific fuel consumption is reported as lb/hp-hr. Therefore, the fuel flow rate (g/sec) is estimated as:

$$m_f = \frac{454 \dot{m}_f W_s}{3,600} \quad (\text{S13})$$

The air flow rate (g/sec) is:

$$m_a = m_f \left( \frac{m_a}{m_f} \right) \quad (\text{S14})$$

The exhaust flow (g/sec) is the sum of the flow of air and fuel:

$$m_e = m_f + m_a \quad (\text{S15})$$

While these equations characterize a mass balance for the engine, they include moisture. In order to calculate PM mass emission rate, the volume flow rate of exhaust on a dry basis is needed. The molar exhaust per mol of C in fuel consumed is equal to the sum of  $b$ ,  $d$ , and  $e$  from Equation S10. Fuel flow is known from specific fuel consumption and can be estimated on a molar basis. The molar flow rate (gmol/sec) of the exhaust is estimated using the ideal gas law and conditions of standard temperature and pressure (STP).

$$M_{e,dry} = (b + d + e) \frac{m_f}{MW_f} \quad (\text{S16})$$

The volumetric dry exhaust flow rate ( $\text{m}^3/\text{sec}$ ) is:

$$V_{e,dry} = M_{e,dry} \left( \frac{RT}{P} \right) \quad (\text{S17})$$

Where,

|   |   |                                                                                               |
|---|---|-----------------------------------------------------------------------------------------------|
| P | = | barometric pressure (assumption: 101,330 Pa)                                                  |
| R | = | ideal gas constant (assumption: $8.3144 \text{ Pa}\cdot\text{m}^3/\text{gmol}\cdot\text{K}$ ) |
| T | = | ambient temperature (assumption: 298 K)                                                       |

The PM mass emission rate (g/sec) is estimated as:

$$E_{PM}^t = C_{PM}^{dry} V_{e,dry} \quad (\text{S18})$$

The fuel-based PM emission rate (g/gal) is estimated as:

$$E_{PM}^f = \frac{E_{PM}^t \rho_f}{m_f} \quad (\text{S19})$$

Engine output-based emission factors are calculated by multiplying the fuel-based emission factors (g/gal) and the fuel use rate (gal/bhp-hr).

## Volumetric Efficiency Estimation

The purpose of this section is to develop a relationship between locomotive prime mover engine parameters during dynamometer measurements and engine volumetric efficiency. Results will be used to estimate engine volumetric efficiency for use in rail yard and over-the-rail measurement analyses.

Dynamometer measurements were conducted on the prime mover engines of locomotives NC 1859 and NC 1869 at the American Motive Power, Inc. (AMP) facility in 2010. The prime mover engines in each locomotive are an EMD 12-710G3B.

The AMP facility contains a water brake dynamometer test cell that is used for performance evaluation of the engine. A control room is connected to the test cell where the dynamometer operator uses a computer, referred to as the dynamometer control system, to both operate the dynamometer and record engine operation data. Unlike a dynamometer facility used for certification tests under the FRM, AMP's facility does not include emissions measurements capabilities. Therefore, a PEMS was used in conjunction with the dynamometer.

Engine fuel use and horsepower output needed for the calculation emission rates are obtained from the dynamometer control system. Specific fuel consumption rates are estimated by the weight differential of a fuel tank on top of a scale as:

$$SFC = \frac{\Delta w_{fuel}}{(HP) \left( \frac{\Delta t}{3600} \right)} \quad (1)$$

Where SFC = specific fuel consumption (lb/hp-hr);  $\Delta w_{fuel}$  = change in fuel tank weight during each notch position (lb); HP = average engine horsepower output during each notch position, derived from the dynamometer torque meter; and  $\Delta t$  = duration of notch position (sec)

For each prime mover engine, three replicate measurements were made on the water brake dynamometer. After a 45-minute warm-up period of the Axion system main unit and an approximately equal time of engine warm-up, the engine was operated at each throttle notch position for approximately 5 minutes, starting at Notch 8 and working down to Idle. Data for each throttle notch were collected by the PEMS in different bags. Time needed to transition the engine to the next notch position was not included in the PEMS bagging and are excluded from data analysis.

Emissions and engine operation data were collected once the engine reached a steady state at each notch position. The PEMS recorded emissions data on a second-by-second basis, including during each 5-minute interval. Five-second average engine operation data were logged by the dynamometer control system approximately every 30 seconds during each 5-minute interval.

For each notch position, measurement replicate, and prime mover engine model, the estimated volumetric efficiency was plotted versus a multiplicative function of engine speed and manifold absolute pressure, since the product of these engine parameters are a good indicator of engine power demand, as shown in Figure SI-11 for the EMD 12-710G3B engines. A trendline was fit to derive a model that would describe the relationship between VE, RPM, and MAP. The



models used to describe the relationship between VE, RPM, and MAP for the datasets have an  $R^2$  value that exceeds 0.95, indicating that the model explains the variation in data very well. VE has been reported to range up to 1.90 for turbocharged 2-stroke diesel engines (14).

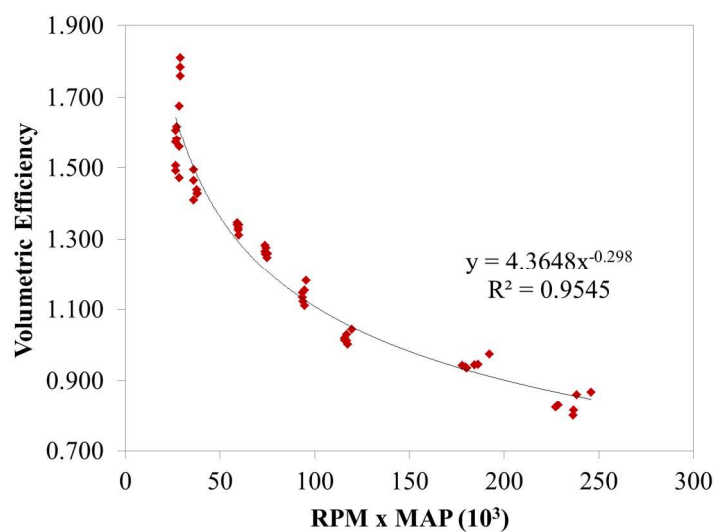

**Figure S9. Model for volumetric efficiency based on engine speed and manifold absolute pressure of two EMD 12-710G3B prime mover engines measured on a dynamometer.**

## Rail Yard Measurement Engine Parameters

**Table S3. Measured Notch Average Engine Performance Parameters from Rail Yard Measurement of Prime Mover Engines**

(a) NC 1797 – F59PHI Locomotive

| Fuel                   | Notch Position | Engine Output (kW) | Engine Speed (RPM) | IAT (K)    | MAP (kPa)  |
|------------------------|----------------|--------------------|--------------------|------------|------------|
| ULSD<br>(3 replicates) | Idle           | 7                  | 343 (0.00)         | 314 (0.00) | 107 (0.01) |
|                        | 1              | 142                | 343 (0.00)         | 314 (0.00) | 107 (0.01) |
|                        | 2              | 261                | 343 (0.00)         | 313 (0.01) | 107 (0.01) |
|                        | 3              | 503                | 490 (0.00)         | 316 (0.00) | 122 (0.01) |
|                        | 4              | 746                | 651 (0.00)         | 314 (0.00) | 146 (0.01) |
|                        | 5              | 969                | 750 (0.00)         | 319 (0.00) | 166 (0.01) |
|                        | 6              | 1,193              | 750 (0.00)         | 318 (0.00) | 168 (0.01) |
|                        | 7              | 1,790              | 820 (0.00)         | 319 (0.00) | 207 (0.00) |
| B10<br>(3 replicates)  | 8              | 2,013              | 903 (0.00)         | 321 (0.00) | 230 (0.01) |
|                        | Idle           | 7                  | 343 (0.00)         | 316 (0.00) | 105 (0.01) |
|                        | 1              | 142                | 343 (0.00)         | 317 (0.01) | 105 (0.00) |
|                        | 2              | 261                | 343 (0.00)         | 315 (0.01) | 105 (0.00) |
|                        | 3              | 503                | 490 (0.00)         | 318 (0.00) | 119 (0.01) |
|                        | 4              | 746                | 651 (0.00)         | 317 (0.00) | 143 (0.01) |
|                        | 5              | 969                | 750 (0.00)         | 321 (0.01) | 163 (0.01) |
|                        | 6              | 1,193              | 750 (0.00)         | 319 (0.01) | 165 (0.01) |
| B20<br>(3 replicates)  | 7              | 1,790              | 820 (0.00)         | 319 (0.00) | 204 (0.01) |
|                        | 8              | 2,013              | 903 (0.00)         | 320 (0.01) | 230 (0.02) |
|                        | Idle           | 7                  | 343 (0.00)         | 318 (0.00) | 104 (0.00) |
|                        | 1              | 142                | 343 (0.00)         | 319 (0.00) | 105 (0.00) |
|                        | 2              | 261                | 343 (0.00)         | 319 (0.00) | 105 (0.00) |
|                        | 3              | 503                | 490 (0.00)         | 318 (0.00) | 119 (0.00) |
|                        | 4              | 746                | 651 (0.00)         | 318 (0.00) | 143 (0.00) |
|                        | 5              | 969                | 750 (0.00)         | 321 (0.00) | 163 (0.00) |
| B40<br>(3 replicates)  | 6              | 1,193              | 750 (0.00)         | 321 (0.00) | 165 (0.00) |
|                        | 7              | 1,790              | 819 (0.00)         | 321 (0.00) | 205 (0.02) |
|                        | 8              | 2,013              | 903 (0.00)         | 322 (0.01) | 224 (0.01) |
|                        | Idle           | 7                  | 343 (0.00)         | 316 (0.00) | 105 (0.00) |
|                        | 1              | 142                | 343 (0.00)         | 316 (0.00) | 105 (0.00) |
|                        | 2              | 261                | 343 (0.00)         | 316 (0.00) | 105 (0.00) |
|                        | 3              | 503                | 490 (0.00)         | 317 (0.00) | 119 (0.00) |
|                        | 4              | 746                | 651 (0.00)         | 319 (0.00) | 143 (0.00) |
|                        | 5              | 969                | 750 (0.00)         | 322 (0.00) | 163 (0.00) |
|                        | 6              | 1,193              | 750 (0.00)         | 321 (0.00) | 164 (0.00) |
|                        | 7              | 1,790              | 820 (0.00)         | 322 (0.00) | 203 (0.00) |
|                        | 8              | 2,013              | 903 (0.00)         | 323 (0.00) | 215 (0.00) |

(b) NC 1810 – F59PH Locomotive

| Fuel                   | Notch Position | Engine Output (kW) | Engine Speed (RPM) | IAT (K)    | MAP (kPa)  |
|------------------------|----------------|--------------------|--------------------|------------|------------|
| ULSD<br>(3 replicates) | Low Idle       | 7                  | 238 (0.00)         | 331 (0.00) | 101 (0.00) |
|                        | High Idle      | 7                  | 386 (0.02)         | 341 (0.00) | 110 (0.01) |
|                        | 1              | 142                | 382 (0.00)         | 333 (0.00) | 110 (0.00) |
|                        | 2              | 261                | 382 (0.00)         | 335 (0.00) | 110 (0.00) |
|                        | 3              | 503                | 491 (0.00)         | 339 (0.00) | 121 (0.00) |
|                        | 4              | 746                | 566 (0.00)         | 340 (0.00) | 132 (0.00) |
|                        | 5              | 969                | 652 (0.00)         | 339 (0.00) | 146 (0.00) |
|                        | 6              | 1,193              | 729 (0.00)         | 341 (0.00) | 162 (0.00) |
|                        | 7              | 1,790              | 821 (0.00)         | 344 (0.01) | 208 (0.03) |
|                        | 8              | 2,013              | 906 (0.00)         | 346 (0.00) | 237 (0.00) |
| B10<br>(1 replicate)   | Low Idle       | 7                  | 205                | 338        | 103        |
|                        | High Idle      | 7                  | 352                | 344        | 111        |
|                        | 1              | 142                | 352                | 342        | 111        |
|                        | 2              | 261                | 352                | 343        | 111        |
|                        | 3              | 503                | 496                | 346        | 125        |
|                        | 4              | 746                | 572                | 348        | 135        |
|                        | 5              | 969                | 654                | 348        | 148        |
|                        | 6              | 1,193              | 731                | 350        | 164        |
|                        | 7              | 1,790              | 827                | 353        | 212        |
|                        | 8              | 2,013              | 908                | 353        | 236        |
| B20<br>(1 replicate)   | Low Idle       | 7                  | 207                | 330        | 103        |
|                        | High Idle      | 7                  | 353                | 342        | 112        |
|                        | 1              | 142                | 353                | 337        | 112        |
|                        | 2              | 261                | 353                | 339        | 112        |
|                        | 3              | 503                | 497                | 343        | 126        |
|                        | 4              | 746                | 573                | 345        | 137        |
|                        | 5              | 969                | 655                | 344        | 151        |
|                        | 6              | 1,193              | 732                | 346        | 167        |
|                        | 7              | 1,790              | 828                | 351        | 215        |
|                        | 8              | 2,013              | 909                | 349        | 236        |
| B40<br>(3 replicates)  | Low Idle       | 7                  | 203 (0.01)         | 337 (0.00) | 103 (0.00) |
|                        | High Idle      | 7                  | 352 (0.00)         | 344 (0.00) | 111 (0.01) |
|                        | 1              | 142                | 351 (0.00)         | 339 (0.00) | 111 (0.00) |
|                        | 2              | 261                | 351 (0.00)         | 344 (0.01) | 111 (0.01) |
|                        | 3              | 503                | 496 (0.00)         | 347 (0.01) | 124 (0.00) |
|                        | 4              | 746                | 572 (0.00)         | 349 (0.01) | 134 (0.00) |
|                        | 5              | 969                | 653 (0.00)         | 348 (0.01) | 147 (0.00) |
|                        | 6              | 1,193              | 731 (0.00)         | 348 (0.00) | 162 (0.00) |
|                        | 7              | 1,790              | 826 (0.00)         | 350 (0.00) | 187 (0.02) |
|                        | 8              | 2,013              | 908 (0.00)         | 352 (0.00) | 227 (0.01) |

| Fuel                   | Notch Position | Engine Output (kW) | Engine Speed (RPM) | IAT (K)    | MAP (kPa)  |
|------------------------|----------------|--------------------|--------------------|------------|------------|
| B60<br>(5 replicates)  | Low Idle       | 7                  | 198 (0.01)         | 331 (0.00) | 99 (0.00)  |
|                        | High Idle      | 7                  | 339 (0.00)         | 340 (0.00) | 107 (0.00) |
|                        | 1              | 142                | 339 (0.00)         | 333 (0.00) | 106 (0.00) |
|                        | 2              | 261                | 339 (0.00)         | 337 (0.00) | 107 (0.00) |
|                        | 3              | 503                | 488 (0.00)         | 340 (0.00) | 120 (0.00) |
|                        | 4              | 746                | 561 (0.00)         | 341 (0.00) | 130 (0.00) |
|                        | 5              | 969                | 650 (0.00)         | 340 (0.01) | 144 (0.00) |
|                        | 6              | 1,193              | 728 (0.00)         | 342 (0.00) | 160 (0.00) |
|                        | 7              | 1,790              | 821 (0.00)         | 345 (0.00) | 189 (0.03) |
|                        | 8              | 2,013              | 901 (0.00)         | 346 (0.01) | 227 (0.01) |
| B80<br>(3 replicates)  | Low Idle       | 7                  | 197 (0.00)         | 333 (0.00) | 101 (0.00) |
|                        | High Idle      | 7                  | 339 (0.00)         | 343 (0.01) | 108 (0.00) |
|                        | 1              | 142                | 339 (0.00)         | 338 (0.00) | 108 (0.00) |
|                        | 2              | 261                | 339 (0.00)         | 341 (0.00) | 108 (0.00) |
|                        | 3              | 503                | 488 (0.00)         | 344 (0.00) | 122 (0.00) |
|                        | 4              | 746                | 563 (0.00)         | 346 (0.00) | 131 (0.00) |
|                        | 5              | 969                | 651 (0.00)         | 345 (0.00) | 145 (0.00) |
|                        | 6              | 1,193              | 728 (0.00)         | 346 (0.00) | 160 (0.00) |
|                        | 7              | 1,790              | 821 (0.00)         | 349 (0.00) | 183 (0.00) |
|                        | 8              | 2,013              | 901 (0.00)         | 349 (0.00) | 223 (0.01) |
| B100<br>(3 replicates) | Low Idle       | 7                  | 199 (0.00)         | 327 (0.00) | 101 (0.00) |
|                        | High Idle      | 7                  | 339 (0.00)         | 339 (0.00) | 109 (0.00) |
|                        | 1              | 142                | 339 (0.00)         | 330 (0.00) | 109 (0.00) |
|                        | 2              | 261                | 339 (0.00)         | 334 (0.00) | 109 (0.00) |
|                        | 3              | 503                | 489 (0.00)         | 338 (0.00) | 124 (0.00) |
|                        | 4              | 746                | 562 (0.00)         | 340 (0.00) | 134 (0.00) |
|                        | 5              | 969                | 651 (0.00)         | 339 (0.00) | 150 (0.00) |
|                        | 6              | 1,193              | 728 (0.00)         | 341 (0.00) | 166 (0.00) |
|                        | 7              | 1,790              | 821 (0.00)         | 347 (0.01) | 215 (0.03) |
|                        | 8              | 2,013              | 901 (0.00)         | 346 (0.01) | 239 (0.01) |

(c) NC 1859 – F59PH Locomotive

| Fuel                   | Notch Position | Engine Output (kW) | Engine Speed (RPM) | IAT (K)    | MAP (kPa)  |
|------------------------|----------------|--------------------|--------------------|------------|------------|
| ULSD<br>(3 replicates) | Low Idle       | 7                  | 238 (0.00)         | 335 (0.01) | 100 (0.00) |
|                        | High Idle      | 7                  | 370 (0.00)         | 346 (0.00) | 108 (0.00) |
|                        | 1              | 142                | 370 (0.00)         | 340 (0.00) | 108 (0.00) |
|                        | 2              | 261                | 370 (0.00)         | 342 (0.00) | 109 (0.00) |
|                        | 3              | 503                | 492 (0.00)         | 345 (0.00) | 120 (0.00) |
|                        | 4              | 746                | 565 (0.00)         | 346 (0.00) | 129 (0.01) |
|                        | 5              | 969                | 653 (0.00)         | 345 (0.00) | 143 (0.01) |
|                        | 6              | 1,193              | 731 (0.00)         | 348 (0.00) | 158 (0.01) |
|                        | 7              | 1,790              | 822 (0.00)         | 349 (0.00) | 181 (0.02) |
|                        | 8              | 2,013              | 904 (0.00)         | 351 (0.00) | 228 (0.01) |
| B10<br>(3 replicates)  | Low Idle       | 7                  | 238 (0.00)         | 333 (0.00) | 102 (0.00) |
|                        | High Idle      | 7                  | 371 (0.00)         | 340 (0.00) | 111 (0.00) |
|                        | 1              | 142                | 370 (0.00)         | 334 (0.00) | 111 (0.00) |
|                        | 2              | 261                | 370 (0.00)         | 337 (0.00) | 111 (0.00) |
|                        | 3              | 503                | 493 (0.00)         | 339 (0.00) | 124 (0.00) |
|                        | 4              | 746                | 565 (0.00)         | 340 (0.00) | 134 (0.00) |
|                        | 5              | 969                | 653 (0.00)         | 339 (0.00) | 149 (0.00) |
|                        | 6              | 1,193              | 731 (0.00)         | 340 (0.00) | 165 (0.00) |
|                        | 7              | 1,790              | 822 (0.00)         | 344 (0.00) | 208 (0.01) |
|                        | 8              | 2,013              | 904 (0.00)         | 344 (0.00) | 234 (0.00) |
| B20<br>(3 replicates)  | Low Idle       | 7                  | 238 (0.00)         | 333 (0.00) | 100 (0.00) |
|                        | High Idle      | 7                  | 371 (0.00)         | 343 (0.00) | 109 (0.00) |
|                        | 1              | 142                | 370 (0.00)         | 333 (0.00) | 109 (0.00) |
|                        | 2              | 261                | 370 (0.00)         | 336 (0.00) | 109 (0.00) |
|                        | 3              | 503                | 493 (0.00)         | 340 (0.00) | 122 (0.00) |
|                        | 4              | 746                | 565 (0.00)         | 342 (0.00) | 132 (0.00) |
|                        | 5              | 969                | 652 (0.00)         | 341 (0.00) | 146 (0.00) |
|                        | 6              | 1,193              | 729 (0.00)         | 343 (0.00) | 163 (0.00) |
|                        | 7              | 1,790              | 821 (0.00)         | 345 (0.01) | 205 (0.00) |
|                        | 8              | 2,013              | 904 (0.00)         | 345 (0.00) | 233 (0.00) |
| B40<br>(3 replicates)  | Low Idle       | 7                  | 239 (0.00)         | 327 (0.01) | 101 (0.01) |
|                        | High Idle      | 7                  | 371 (0.00)         | 340 (0.00) | 109 (0.01) |
|                        | 1              | 142                | 370 (0.00)         | 330 (0.00) | 109 (0.01) |
|                        | 2              | 261                | 370 (0.00)         | 334 (0.01) | 110 (0.01) |
|                        | 3              | 503                | 492 (0.00)         | 337 (0.00) | 122 (0.00) |
|                        | 4              | 746                | 565 (0.00)         | 340 (0.00) | 131 (0.01) |
|                        | 5              | 969                | 653 (0.00)         | 337 (0.00) | 146 (0.01) |
|                        | 6              | 1,193              | 730 (0.00)         | 340 (0.01) | 162 (0.01) |
|                        | 7              | 1,790              | 822 (0.00)         | 344 (0.00) | 191 (0.02) |
|                        | 8              | 2,013              | 904 (0.00)         | 345 (0.01) | 229 (0.01) |

Italicized values in parentheses are coefficients of variation on the mean emission rate.

## Rail Yard Measurement Emission Rates

Correction factors are used to adjust for biases associated with the PEMS emissions measurement methods for NO<sub>x</sub>, HC, and PM (15). NO<sub>x</sub> includes NO and NO<sub>2</sub>. Only NO was measured. The overall response to NDIR to a mixture of hydrocarbons in engine exhaust is less than the actual total HC (13, 16). The cycle average NO<sub>x</sub>/NO ratio and FID/NDIR ratio for HC were evaluated for the same locomotives measured here using a SEMTECH-DS PEMS (10). RY measurements were made with the Axion as well as a SEMTECH-DS PEMS that measures both NO and NO<sub>2</sub> and that measures HC with both NDIR and FID using a heated sample line. The NO<sub>x</sub>/NO ratio for each notch position of each locomotive for various fuels were estimated from the SEMTECH-measured exhaust concentrations of NO and NO<sub>2</sub>. The NO<sub>x</sub>/NO ratios were used as the NO<sub>x</sub> bias correction factor. The FID/NDIR ratio for HC was also estimated as a ratio of the HC exhaust concentrations measured by the SEMTECH for FID versus NDIR. The FID/NDIR ratios for each fuel, locomotive, and notch position were used as the HC bias correction factor. The NO<sub>x</sub>/NO and FID/NDIR ratios are included below in Tables S4 and S5.

The trends in the data are significant and repeatable for NO<sub>x</sub>, PM, and CO<sub>2</sub>, based on the CVs shown below in Table S6 (for RY measurements). The trends in the emission rates for HC and CO are less significant and have more imprecision, given that a majority of the concentrations of these pollutants were at or below the detection limit of the PEMS. Since diesel engines typically emit relatively low CO and HC emission rates, it is not surprising that these engines also have relatively low CO and HC emission rates. In this regard, we have confidence in all of these data. An instrument with lower HC and CO detection limits would increase the precision of the HC and CO emission rate estimates but would not change the basic insight that these emissions are relatively low.

**Table S4. NO<sub>x</sub> Bias Correction Factors based on SEMTECH Measurements**

(a) ULSD

| Notch Position | NC 1797 | NC 1810 | NC 1859 |
|----------------|---------|---------|---------|
| Idle           | 1.105   | 1.033   | 1.082   |
| Dynamic Brake* | 1.105   | 1.033   | 1.082   |
| 1              | 1.098   | 1.069   | 1.072   |
| 2              | 1.078   | 1.050   | 1.042   |
| 3              | 1.071   | 1.045   | 1.033   |
| 4              | 1.076   | 1.040   | 1.030   |
| 5              | 1.077   | 1.041   | 1.033   |
| 6              | 1.063   | 1.038   | 1.031   |
| 7              | 1.059   | 1.051   | 1.039   |
| 8              | 1.072   | 1.070   | 1.065   |

(b) B10

| Notch Position | NC 1797 | NC 1810                                   | NC 1859 |
|----------------|---------|-------------------------------------------|---------|
| Idle           | 1.082   | No<br>SEMTECH<br>Measurements             | 1.116   |
| Dynamic Brake* | 1.082   |                                           | 1.116   |
| 1              | 1.086   |                                           | 1.101   |
| 2              | 1.074   |                                           | 1.072   |
| 3              | 1.067   |                                           | 1.065   |
| 4              | 1.070   | Using<br>NC 1859<br>Correction<br>Factors | 1.060   |
| 5              | 1.072   |                                           | 1.060   |
| 6              | 1.064   |                                           | 1.057   |
| 7              | 1.056   |                                           | 1.061   |
| 8              | 1.067   |                                           | 1.083   |

(c) B20

| Notch Position | NC 1797                                                               | NC 1810 | NC 1859 |
|----------------|-----------------------------------------------------------------------|---------|---------|
| Idle           | No SEMTECH<br>Measurements<br><br>Using NC 1859<br>Correction Factors |         | 1.093   |
| Dynamic Brake* |                                                                       |         | 1.093   |
| 1              |                                                                       |         | 1.095   |
| 2              |                                                                       |         | 1.066   |
| 3              |                                                                       |         | 1.059   |
| 4              |                                                                       |         | 1.054   |
| 5              |                                                                       |         | 1.054   |
| 6              |                                                                       |         | 1.051   |
| 7              |                                                                       |         | 1.056   |
| 8              |                                                                       |         | 1.077   |

(d) B40

| Notch Position | NC 1797 | NC 1810                                                                        | NC 1859 |
|----------------|---------|--------------------------------------------------------------------------------|---------|
| Idle           | 1.177   | No<br>SEMTECH<br>Measurements<br><br>Using<br>NC 1859<br>Correction<br>Factors | 1.090   |
| Dynamic Brake* | 1.177   |                                                                                | 1.090   |
| 1              | 1.134   |                                                                                | 1.085   |
| 2              | 1.097   |                                                                                | 1.059   |
| 3              | 1.094   |                                                                                | 1.054   |
| 4              | 1.102   |                                                                                | 1.051   |
| 5              | 1.098   |                                                                                | 1.051   |
| 6              | 1.081   |                                                                                | 1.049   |
| 7              | 1.081   |                                                                                | 1.050   |
| 8              | 1.094   |                                                                                | 1.067   |

(e) B60

| Notch Position | NC 1810 |
|----------------|---------|
| Idle           | 1.102   |
| Dynamic Brake* | 1.102   |
| 1              | 1.096   |
| 2              | 1.071   |
| 3              | 1.066   |
| 4              | 1.060   |
| 5              | 1.059   |
| 6              | 1.057   |
| 7              | 1.062   |
| 8              | 1.077   |

(f) B80

| Notch Position | NC 1810 |
|----------------|---------|
| Idle           | 1.093   |
| Dynamic Brake* | 1.093   |
| 1              | 1.083   |
| 2              | 1.058   |
| 3              | 1.048   |
| 4              | 1.043   |
| 5              | 1.043   |
| 6              | 1.038   |
| 7              | 1.041   |
| 8              | 1.068   |

(g) B100

| Notch Position | NC 1810 |
|----------------|---------|
| Idle           | 1.090   |
| Dynamic Brake* | 1.090   |
| 1              | 1.082   |
| 2              | 1.064   |
| 3              | 1.059   |
| 4              | 1.055   |
| 5              | 1.053   |
| 6              | 1.052   |
| 7              | 1.056   |
| 8              | 1.075   |

**Table S5. NO<sub>x</sub> Bias Correction Factors based on Ambient Temperature and Humidity**

(a) NC 1797

| <b>Fuel</b> | <b>RY</b> | <b>OTR</b> |
|-------------|-----------|------------|
| ULSD        | 0.7550    | 0.7941     |
| B10         | 0.7535    | 0.7326     |
| B20         | 0.8464    | 0.7104     |
| B40         | 0.8322    | 0.8747     |

(b) NC 1810

| <b>Fuel</b> | <b>RY</b> | <b>OTR</b> |
|-------------|-----------|------------|
| ULSD        | 0.6534    | 0.7624     |
| B10         | 0.8452    | 0.8707     |
| B20         | 0.8407    | 0.7970     |
| B40         | 0.7363    | 0.6957     |
| B60         | 0.7601    | 0.8004     |
| B80         | 0.8421    | 0.7388     |
| B100        | 0.6134    | 0.6672     |

(c) NC 1859

| <b>Fuel</b> | <b>RY</b> | <b>OTR</b> |
|-------------|-----------|------------|
| ULSD        | 0.8589    | 0.8660     |
| B10         | 0.6492    | 0.6090     |
| B20         | 0.6576    | 0.6873     |
| B40         | 0.7446    | 0.7718     |

NO<sub>x</sub> correction factors were estimated for each day of OTR measurements using the following equations from Lindhjem *et al.* (16):

$$K_{NO_x} = 1 / (K_H K_T)$$

$$K_H = 1989.6 / (85.444 + 2219.426 \exp (-0.0143 H))$$

$$K_T = 1 / (1 - 0.017 (30 - T))$$

Where H = ambient humidity, gH<sub>2</sub>O/kg of dry air

T = ambient temperature, °C

NO<sub>x</sub> emission rates for each OTR measurement were adjusted using the NO<sub>x</sub> correction factor for the day in which the OTR measurement was made. OTR correction factors in the table above are the average NO<sub>x</sub> correction factors for all OTR measurements of a particular locomotive and fuel blend.



**Table S6. HC Bias Correction Factors for Rail Yard Emission Rates based on SEMTECH and Axion Measurements**

(a) ULSD

| Notch Position | NC 1797 | NC 1810 | NC 1859 |
|----------------|---------|---------|---------|
| Idle           | 2.617   | 5.130   | 5.914   |
| Dynamic Brake* | 2.617   | 5.130   | 5.914   |
| 1              | 3.379   | 5.110   | 6.046   |
| 2              | 2.636   | 3.691   | 3.850   |
| 3              | 2.818   | 3.418   | 3.402   |
| 4              | 2.147   | 2.982   | 3.290   |
| 5              | 3.473   | 2.846   | 3.027   |
| 6              | 3.802   | 2.662   | 2.885   |
| 7              | 2.853   | 4.983   | 3.130   |
| 8              | 5.077   | 6.626   | 7.129   |

(b) B10

| Notch Position | NC 1797 | NC 1810                          | NC 1859 |
|----------------|---------|----------------------------------|---------|
| Idle           | 5.338   | No SEMTECH Measurements          | 5.428   |
| Dynamic Brake* | 5.338   |                                  | 5.428   |
| 1              | 2.148   |                                  | 2.970   |
| 2              | 1.919   |                                  | 2.904   |
| 3              | 1.666   |                                  | 2.882   |
| 4              | 1.640   | Using NC 1859 Correction Factors | 2.801   |
| 5              | 1.992   |                                  | 2.804   |
| 6              | 1.907   |                                  | 3.073   |
| 7              | 3.688   |                                  | 4.462   |
| 8              | 5.542   |                                  | 7.039   |

(c) B20

| Notch Position | NC 1797                                                         | NC 1810 | NC 1859 |
|----------------|-----------------------------------------------------------------|---------|---------|
| Idle           | No SEMTECH Measurements<br><br>Using NC 1859 Correction Factors |         | 2.761   |
| Dynamic Brake* |                                                                 |         | 2.761   |
| 1              |                                                                 |         | 1.511   |
| 2              |                                                                 |         | 1.496   |
| 3              |                                                                 |         | 1.423   |
| 4              |                                                                 |         | 1.440   |
| 5              |                                                                 |         | 1.415   |
| 6              |                                                                 |         | 1.397   |
| 7              |                                                                 |         | 1.846   |
| 8              |                                                                 |         | 3.939   |

(d) B40

| Notch Position | NC 1797 | NC 1810                          | NC 1859 |
|----------------|---------|----------------------------------|---------|
| Idle           | 2.605   | No SEMTECH Measurements          | 3.221   |
| Dynamic Brake* | 2.605   |                                  | 3.221   |
| 1              | 1.331   |                                  | 2.297   |
| 2              | 1.307   |                                  | 2.203   |
| 3              | 1.312   |                                  | 2.184   |
| 4              | 1.475   | Using NC 1859 Correction Factors | 2.083   |
| 5              | 1.627   |                                  | 1.950   |
| 6              | 1.861   |                                  | 2.005   |
| 7              | 3.246   |                                  | 2.898   |
| 8              | 4.941   |                                  | 5.607   |

(e) B60

| Notch Position | NC 1810 |
|----------------|---------|
| Idle           | 2.462   |
| Dynamic Brake* | 2.462   |
| 1              | 1.227   |
| 2              | 1.121   |
| 3              | 2.158   |
| 4              | 1.185   |
| 5              | 1.205   |
| 6              | 1.225   |
| 7              | 1.955   |
| 8              | 4.225   |

(f) B80

| Notch Position | NC 1810 |
|----------------|---------|
| Idle           | 3.868   |
| Dynamic Brake* | 3.868   |
| 1              | 2.049   |
| 2              | 1.860   |
| 3              | 1.865   |
| 4              | 1.929   |
| 5              | 1.818   |
| 6              | 2.431   |
| 7              | 3.809   |
| 8              | 8.234   |

(g) B100

| Notch Position | NC 1810 |
|----------------|---------|
| Idle           | 6.216   |
| Dynamic Brake* | 6.216   |
| 1              | 6.987   |
| 2              | 5.524   |
| 3              | 3.605   |
| 4              | 3.814   |
| 5              | 4.062   |
| 6              | 3.601   |
| 7              | 5.068   |
| 8              | 10.326  |

**Table S7. Time-Based Notch Average Emission Rates from Rail Yard Measurement of Prime Mover Engines**

(a) NC 1797 – F59PHI Locomotive

| Fuel                   | Notch Position | NO as NO <sub>2</sub> (g/s) | HC (g/s)    | CO (g/s)    | Opacity-based PM (g/s) | CO <sub>2</sub> (g/s) |
|------------------------|----------------|-----------------------------|-------------|-------------|------------------------|-----------------------|
| ULSD<br>(3 replicates) | Idle           | 0.31 (0.11)                 | 0.18 (0.21) | 0.02 (0.69) | 0.01 (0.06)            | 8.73 (0.14)           |
|                        | 1              | 0.81 (0.09)                 | 0.06 (0.68) | 0.02 (0.90) | 0.02 (0.03)            | 29.0 (0.05)           |
|                        | 2              | 1.39 (0.04)                 | 0.07 (0.77) | 0.02 (0.56) | 0.02 (0.04)            | 43.9 (0.05)           |
|                        | 3              | 1.90 (0.01)                 | 0.06 (0.25) | 0.01 (1.24) | 0.02 (0.03)            | 79.4 (0.01)           |
|                        | 4              | 2.28 (0.01)                 | 0.08 (0.36) | 0.01 (1.48) | 0.02 (0.04)            | 123 (0.00)            |
|                        | 5              | 3.18 (0.02)                 | 0.11 (0.14) | 0.00 (1.23) | 0.03 (0.03)            | 167 (0.01)            |
|                        | 6              | 3.67 (0.06)                 | 0.70 (0.77) | 0.00 (1.63) | 0.03 (0.02)            | 198 (0.06)            |
|                        | 7              | 4.57 (0.00)                 | 0.35 (0.33) | 0.06 (0.57) | 0.12 (0.02)            | 324 (0.02)            |
|                        | 8              | 6.13 (0.01)                 | 1.14 (0.93) | 0.74 (0.17) | 0.15 (0.06)            | 420 (0.01)            |
| B10<br>(3 replicates)  | Idle           | 0.43 (0.01)                 | 0.86 (0.62) | 0.06 (0.44) | 0.01 (0.09)            | 13.5 (0.01)           |
|                        | 1              | 1.10 (0.02)                 | 0.27 (0.54) | 0.05 (0.16) | 0.01 (0.04)            | 35.4 (0.01)           |
|                        | 2              | 1.91 (0.03)                 | 0.40 (0.37) | 0.07 (0.41) | 0.01 (0.03)            | 53.9 (0.01)           |
|                        | 3              | 2.43 (0.02)                 | 0.45 (0.16) | 0.09 (0.22) | 0.02 (0.01)            | 92.5 (0.01)           |
|                        | 4              | 2.86 (0.03)                 | 0.62 (0.35) | 0.16 (0.57) | 0.03 (0.03)            | 140 (0.00)            |
|                        | 5              | 3.89 (0.04)                 | 0.59 (0.46) | 0.10 (0.09) | 0.03 (0.02)            | 180 (0.01)            |
|                        | 6              | 4.55 (0.01)                 | 0.75 (0.36) | 0.11 (0.92) | 0.03 (0.01)            | 219 (0.02)            |
|                        | 7              | 5.31 (0.02)                 | 1.63 (0.15) | 0.14 (0.94) | 0.13 (0.05)            | 356 (0.01)            |
|                        | 8              | 7.36 (0.02)                 | 3.55 (0.16) | 0.55 (0.19) | 0.18 (0.12)            | 433 (0.00)            |
| B20<br>(3 replicates)  | Idle           | 0.42 (0.25)                 | 0.78 (0.19) | 0.07 (0.70) | 0.01 (0.02)            | 11.4 (0.21)           |
|                        | 1              | 0.95 (0.04)                 | 0.30 (0.13) | 0.01 (1.36) | 0.01 (0.04)            | 26.0 (0.09)           |
|                        | 2              | 1.73 (0.03)                 | 0.38 (0.21) | 0.01 (0.87) | 0.01 (0.01)            | 41.5 (0.08)           |
|                        | 3              | 2.20 (0.03)                 | 0.54 (0.21) | 0.01 (0.98) | 0.02 (0.02)            | 71.1 (0.06)           |
|                        | 4              | 2.54 (0.02)                 | 0.84 (0.07) | 0.01 (1.73) | 0.02 (0.02)            | 115 (0.06)            |
|                        | 5              | 3.55 (0.01)                 | 0.49 (0.58) | 0.00 (n/a)  | 0.02 (0.02)            | 146 (0.00)            |
|                        | 6              | 4.15 (0.02)                 | 0.88 (0.32) | 0.04 (0.96) | 0.02 (0.01)            | 193 (0.02)            |
|                        | 7              | 5.09 (0.04)                 | 0.87 (0.92) | 0.13 (0.97) | 0.10 (0.06)            | 311 (0.01)            |
|                        | 8              | 7.34 (0.03)                 | 4.85 (0.32) | 0.60 (0.25) | 0.11 (0.07)            | 398 (0.09)            |

| Fuel                      | Notch Position | NO as NO <sub>2</sub> (g/s) | HC (g/s)    | CO (g/s)    | Opacity-based PM (g/s) | CO <sub>2</sub> (g/s) |
|---------------------------|----------------|-----------------------------|-------------|-------------|------------------------|-----------------------|
| B40<br><br>(3 replicates) | Idle           | 0.50 (0.02)                 | 0.26 (0.99) | 0.06 (0.79) | 0.01 (0.07)            | 15.8 (0.02)           |
|                           | 1              | 1.13 (0.00)                 | 0.03 (1.63) | 0.03 (0.92) | 0.01 (0.06)            | 38.1 (0.02)           |
|                           | 2              | 1.94 (0.01)                 | 0.07 (1.38) | 0.04 (1.60) | 0.01 (0.07)            | 56.4 (0.01)           |
|                           | 3              | 2.37 (0.01)                 | 0.09 (1.44) | 0.06 (1.60) | 0.01 (0.02)            | 96.4 (0.00)           |
|                           | 4              | 2.68 (0.01)                 | 0.14 (1.45) | 0.09 (1.73) | 0.02 (0.01)            | 144 (0.01)            |
|                           | 5              | 3.73 (0.01)                 | 0.06 (1.24) | 0.04 (1.73) | 0.03 (0.01)            | 187 (0.01)            |
|                           | 6              | 4.41 (0.02)                 | 0.70 (0.52) | 0.06 (1.35) | 0.03 (0.01)            | 237 (0.01)            |
|                           | 7              | 5.00 (0.00)                 | 1.33 (0.28) | 0.34 (0.80) | 0.15 (0.05)            | 375 (0.01)            |
|                           | 8              | 7.02 (0.01)                 | 1.28 (0.72) | 0.60 (0.25) | 0.19 (0.28)            | 446 (0.01)            |

(b) NC 1810 – F59PH Locomotive

| Fuel                       | Notch Position | NO as NO <sub>2</sub> (g/s) | HC (g/s)    | CO (g/s)    | Opacity-based PM (g/s) | CO <sub>2</sub> (g/s) |
|----------------------------|----------------|-----------------------------|-------------|-------------|------------------------|-----------------------|
| ULSD<br><br>(3 replicates) | Low Idle       | 0.13 (0.08)                 | 1.30 (0.06) | 0.08 (0.24) | 0.01 (0.06)            | 7.75 (0.07)           |
|                            | High Idle      | 0.17 (0.05)                 | 1.82 (0.03) | 0.09 (0.24) | 0.01 (0.11)            | 14.4 (0.04)           |
|                            | 1              | 0.36 (0.05)                 | 1.21 (0.08) | 0.06 (0.37) | 0.01 (0.01)            | 31.6 (0.03)           |
|                            | 2              | 0.64 (0.04)                 | 1.01 (0.10) | 0.07 (0.44) | 0.02 (0.02)            | 47.9 (0.03)           |
|                            | 3              | 1.21 (0.01)                 | 1.23 (0.16) | 0.07 (0.33) | 0.03 (0.01)            | 85.6 (0.01)           |
|                            | 4              | 1.64 (0.01)                 | 1.10 (0.12) | 0.09 (0.70) | 0.05 (0.03)            | 127 (0.01)            |
|                            | 5              | 2.03 (0.02)                 | 0.84 (0.10) | 0.08 (0.67) | 0.06 (0.03)            | 170 (0.01)            |
|                            | 6              | 2.43 (0.01)                 | 2.00 (0.16) | 0.12 (0.91) | 0.07 (0.00)            | 209 (0.01)            |
|                            | 7              | 3.02 (0.04)                 | 2.66 (0.46) | 0.72 (0.33) | 0.22 (0.11)            | 317 (0.02)            |
|                            | 8              | 3.35 (0.01)                 | 2.50 (0.26) | 0.98 (0.06) | 0.28 (0.15)            | 391 (0.01)            |
| B10<br><br>(1 replicate)   | Low Idle       | 0.16                        | 0.16        | 0.01        | 0.01                   | 7.98                  |
|                            | High Idle      | 0.24                        | 0.12        | 0.01        | 0.01                   | 14.8                  |
|                            | 1              | 0.51                        | 0.11        | 0.04        | 0.02                   | 31.6                  |
|                            | 2              | 0.88                        | 0.12        | 0.04        | 0.03                   | 48.6                  |
|                            | 3              | 1.59                        | 0.13        | 0.04        | 0.04                   | 85.3                  |
|                            | 4              | 2.17                        | 0.04        | 0.11        | 0.06                   | 127                   |
|                            | 5              | 2.54                        | 0.00        | 0.13        | 0.09                   | 170                   |
|                            | 6              | 3.04                        | 0.01        | 0.12        | 0.11                   | 204                   |
|                            | 7              | 3.75                        | 0.23        | 0.88        | 0.17                   | 316                   |
|                            | 8              | 3.78                        | 0.09        | 1.40        | 0.26                   | 416                   |

| Fuel                  | Notch Position | NO as NO <sub>2</sub> (g/s) | HC (g/s)    | CO (g/s)    | Opacity-based PM (g/s) | CO <sub>2</sub> (g/s) |
|-----------------------|----------------|-----------------------------|-------------|-------------|------------------------|-----------------------|
| B20<br>(1 replicate)  | Low Idle       | 0.14                        | 0.01        | 0.01        | 0.01                   | 6.73                  |
|                       | High Idle      | 0.24                        | 0.10        | 0.01        | 0.00                   | 32.1                  |
|                       | 1              | 0.45                        | 0.00        | 0.02        | 0.01                   | 20.6                  |
|                       | 2              | 0.79                        | 0.00        | 0.01        | 0.01                   | 37.6                  |
|                       | 3              | 1.56                        | 0.01        | 0.02        | 0.02                   | 63.9                  |
|                       | 4              | 2.06                        | 0.00        | 0.05        | 0.03                   | 101                   |
|                       | 5              | 2.65                        | 0.00        | 0.09        | 0.04                   | 109                   |
|                       | 6              | 3.05                        | 0.03        | 0.02        | 0.04                   | 149                   |
|                       | 7              | 3.69                        | 0.17        | 0.50        | 0.07                   | 282                   |
|                       | 8              | 3.66                        | 0.55        | 0.76        | 0.11                   | 421                   |
| B40<br>(1 replicates) | Low Idle       | 0.16                        | 0.07        | 0.03        | 0.01                   | 5.69                  |
|                       | High Idle      | n/a                         | n/a         | n/a         | n/a                    | n/a                   |
|                       | 1              | 0.52                        | 0.07        | 0.00        | 0.01                   | 24.7                  |
|                       | 2              | 0.91                        | 0.08        | 0.00        | 0.02                   | 43.2                  |
|                       | 3              | 1.65                        | 0.15        | 0.01        | 0.03                   | 69.7                  |
|                       | 4              | 2.13                        | 0.20        | 0.05        | 0.04                   | 112                   |
|                       | 5              | 2.85                        | 0.04        | 0.00        | 0.06                   | 144                   |
|                       | 6              | 3.17                        | 0.06        | 0.04        | 0.06                   | 191                   |
|                       | 7              | 3.86                        | 0.49        | 0.06        | 0.13                   | 284                   |
|                       | 8              | 3.96                        | 0.07        | 0.74        | 0.43                   | 358                   |
| B60<br>(5 replicates) | Low Idle       | 0.16 (0.08)                 | 0.09 (0.80) | 0.07 (0.61) | 0.01 (0.09)            | 8.28 (0.12)           |
|                       | High Idle      | 0.21 (0.07)                 | 0.10 (0.91) | 0.07 (0.88) | 0.00 (0.22)            | 13.4 (0.07)           |
|                       | 1              | 0.51 (0.10)                 | 0.06 (1.17) | 0.08 (0.59) | 0.01 (0.07)            | 36.0 (0.05)           |
|                       | 2              | 0.85 (0.12)                 | 0.06 (1.07) | 0.08 (0.67) | 0.02 (0.03)            | 52.2 (0.05)           |
|                       | 3              | 1.55 (0.12)                 | 0.11 (1.24) | 0.08 (0.90) | 0.02 (0.07)            | 94.3 (0.02)           |
|                       | 4              | 2.04 (0.11)                 | 0.05 (1.41) | 0.10 (1.00) | 0.04 (0.07)            | 134 (0.01)            |
|                       | 5              | 2.52 (0.10)                 | 0.03 (1.58) | 0.07 (1.09) | 0.05 (0.12)            | 181 (0.00)            |
|                       | 6              | 2.99 (0.09)                 | 0.11 (0.99) | 0.15 (1.35) | 0.06 (0.14)            | 226 (0.02)            |
|                       | 7              | 3.68 (0.11)                 | 0.11 (0.96) | 0.40 (0.60) | 0.12 (0.19)            | 325 (0.06)            |
|                       | 8              | 4.13 (0.06)                 | 0.63 (1.13) | 0.63 (0.55) | 0.18 (0.18)            | 407 (0.03)            |

| Fuel                   | Notch Position | NO as NO <sub>2</sub> (g/s) | HC (g/s)    | CO (g/s)    | Opacity-based PM (g/s) | CO <sub>2</sub> (g/s) |
|------------------------|----------------|-----------------------------|-------------|-------------|------------------------|-----------------------|
| B80<br>(3 replicates)  | Low Idle       | 0.12 (0.06)                 | 0.04 (0.29) | 0.01 (0.68) | 0.02 (0.06)            | 6.41 (0.09)           |
|                        | High Idle      | 0.16 (0.01)                 | 0.08 (0.61) | 0.02 (0.06) | 0.02 (0.16)            | 9.63 (0.01)           |
|                        | 1              | 0.41 (0.01)                 | 0.03 (0.21) | 0.01 (0.61) | 0.03 (0.02)            | 27.6 (0.01)           |
|                        | 2              | 0.61 (0.00)                 | 0.06 (0.18) | 0.01 (0.71) | 0.04 (0.00)            | 36.1 (0.01)           |
|                        | 3              | 1.32 (0.01)                 | 0.03 (0.27) | 0.00 (0.82) | 0.05 (0.04)            | 77.0 (0.00)           |
|                        | 4              | 1.67 (0.01)                 | 0.05 (0.35) | 0.01 (0.77) | 0.07 (0.04)            | 107 (0.01)            |
|                        | 5              | 2.28 (0.00)                 | 0.05 (0.10) | 0.03 (0.31) | 0.10 (0.05)            | 161 (0.01)            |
|                        | 6              | 2.88 (0.00)                 | 0.04 (0.25) | 0.08 (0.24) | 0.15 (0.03)            | 223 (0.01)            |
|                        | 7              | 3.48 (0.02)                 | 0.08 (1.35) | 0.37 (0.12) | 0.25 (0.08)            | 312 (0.01)            |
|                        | 8              | 4.16 (0.01)                 | 0.39 (1.26) | 1.80 (0.11) | 0.46 (0.20)            | 417 (0.00)            |
| B100<br>(3 replicates) | Low Idle       | 0.13 (0.01)                 | 0.99 (0.42) | 0.07 (0.23) | 0.01 (0.05)            | 8.37 (0.05)           |
|                        | High Idle      | 0.22 (0.11)                 | 1.72 (0.53) | 0.12 (0.59) | 0.01 (0.34)            | 14.6 (0.05)           |
|                        | 1              | 0.45 (0.01)                 | 0.87 (0.53) | 0.04 (0.75) | 0.01 (0.02)            | 36.8 (0.01)           |
|                        | 2              | 0.74 (0.03)                 | 1.01 (0.53) | 0.07 (0.77) | 0.02 (0.01)            | 53.3 (0.01)           |
|                        | 3              | 1.41 (0.01)                 | 0.65 (0.52) | 0.03 (0.90) | 0.02 (0.02)            | 99.9 (0.01)           |
|                        | 4              | 1.84 (0.02)                 | 0.67 (0.58) | 0.04 (1.18) | 0.03 (0.02)            | 140 (0.00)            |
|                        | 5              | 2.27 (0.02)                 | 0.68 (0.69) | 0.05 (1.26) | 0.04 (0.01)            | 190 (0.01)            |
|                        | 6              | 2.74 (0.02)                 | 0.68 (0.95) | 0.05 (1.22) | 0.05 (0.03)            | 236 (0.00)            |
|                        | 7              | 3.59 (0.03)                 | 0.91 (0.95) | 0.06 (0.36) | 0.17 (0.10)            | 337 (0.00)            |
|                        | 8              | 3.83 (0.02)                 | 0.69 (0.34) | 0.20 (0.50) | 0.30 (0.43)            | 419 (0.01)            |

## (c) NC 1859 – F59PH Locomotive

| Fuel                   | Notch Position | NO as NO <sub>2</sub> (g/s) | HC (g/s)    | CO (g/s)    | Opacity-based PM (g/s) | CO <sub>2</sub> (g/s) |
|------------------------|----------------|-----------------------------|-------------|-------------|------------------------|-----------------------|
| ULSD<br>(3 replicates) | Low Idle       | 0.17 (0.02)                 | 0.23 (0.26) | 0.07 (0.29) | 0.02 (0.04)            | 9.20 (0.02)           |
|                        | High Idle      | 0.20 (0.00)                 | 1.42 (0.37) | 0.73 (0.46) | 0.02 (0.02)            | 13.8 (0.02)           |
|                        | 1              | 0.45 (0.02)                 | 0.47 (0.15) | 0.10 (0.31) | 0.03 (0.02)            | 35.5 (0.01)           |
|                        | 2              | 0.79 (0.04)                 | 0.78 (0.08) | 0.16 (0.04) | 0.03 (0.01)            | 53.7 (0.01)           |
|                        | 3              | 1.42 (0.03)                 | 1.25 (0.08) | 0.27 (0.09) | 0.05 (0.02)            | 93.7 (0.00)           |
|                        | 4              | 1.84 (0.02)                 | 1.56 (0.18) | 0.41 (0.34) | 0.07 (0.02)            | 126 (0.03)            |
|                        | 5              | 2.25 (0.03)                 | 0.91 (0.87) | 0.23 (0.91) | 0.09 (0.02)            | 171 (0.01)            |
|                        | 6              | 2.78 (0.06)                 | 0.00 (n/a)  | 0.30 (0.25) | 0.13 (0.02)            | 226 (0.02)            |
|                        | 7              | 3.23 (0.09)                 | 2.01 (1.12) | 1.36 (0.85) | 0.21 (0.05)            | 304 (0.03)            |
|                        | 8              | 3.79 (0.04)                 | 2.99 (0.13) | 1.50 (0.04) | 0.28 (0.02)            | 392 (0.00)            |
| B10<br>(3 replicates)  | Low Idle       | 0.15 (0.04)                 | 0.22 (0.55) | 0.05 (0.56) | 0.01 (0.05)            | 9.07 (0.03)           |
|                        | High Idle      | 0.19 (0.05)                 | 0.36 (0.14) | 0.09 (0.25) | 0.02 (0.10)            | 14.7 (0.01)           |
|                        | 1              | 0.44 (0.06)                 | 0.11 (0.54) | 0.04 (0.46) | 0.01 (0.02)            | 35.8 (0.01)           |
|                        | 2              | 0.77 (0.06)                 | 0.09 (0.40) | 0.03 (0.66) | 0.02 (0.01)            | 53.2 (0.01)           |
|                        | 3              | 1.40 (0.05)                 | 0.09 (0.67) | 0.02 (0.00) | 0.02 (0.01)            | 91.8 (0.00)           |
|                        | 4              | 1.89 (0.06)                 | 0.07 (0.40) | 0.01 (0.87) | 0.03 (0.07)            | 130 (0.00)            |
|                        | 5              | 2.38 (0.04)                 | 0.09 (0.47) | 0.02 (0.00) | 0.04 (0.03)            | 173 (0.00)            |
|                        | 6              | 2.82 (0.04)                 | 0.16 (0.07) | 0.03 (0.00) | 0.04 (0.05)            | 212 (0.00)            |
|                        | 7              | 3.64 (0.04)                 | 0.19 (0.34) | 0.15 (0.27) | 0.10 (0.06)            | 310 (0.00)            |
|                        | 8              | 3.93 (0.03)                 | 0.09 (0.33) | 0.22 (0.51) | 0.18 (0.22)            | 372 (0.00)            |
| B20<br>(3 replicates)  | Low Idle       | 0.13 (0.05)                 | 0.32 (0.46) | 0.07 (0.46) | 0.01 (0.04)            | 7.55 (0.13)           |
|                        | High Idle      | 0.17 (0.06)                 | 0.47 (0.14) | 0.09 (0.21) | 0.01 (0.09)            | 12.9 (0.14)           |
|                        | 1              | 0.40 (0.03)                 | 0.33 (0.37) | 0.08 (0.43) | 0.02 (0.03)            | 30.8 (0.02)           |
|                        | 2              | 0.71 (0.02)                 | 0.41 (0.30) | 0.09 (0.28) | 0.02 (0.04)            | 46.7 (0.04)           |
|                        | 3              | 1.30 (0.02)                 | 0.53 (0.30) | 0.09 (0.43) | 0.03 (0.03)            | 80.8 (0.03)           |
|                        | 4              | 1.76 (0.02)                 | 0.57 (0.40) | 0.09 (0.44) | 0.04 (0.02)            | 118 (0.02)            |
|                        | 5              | 2.23 (0.02)                 | 0.36 (0.40) | 0.02 (0.87) | 0.05 (0.03)            | 158 (0.01)            |
|                        | 6              | 2.65 (0.03)                 | 0.96 (0.38) | 0.09 (0.88) | 0.06 (0.01)            | 194 (0.01)            |
|                        | 7              | 3.46 (0.03)                 | 2.12 (0.40) | 0.27 (0.77) | 0.12 (0.02)            | 286 (0.01)            |
|                        | 8              | 3.66 (0.04)                 | 0.27 (0.63) | 0.22 (0.20) | 0.16 (0.15)            | 374 (0.03)            |

| Fuel                      | Notch Position | NO as NO <sub>2</sub> (g/s) | HC (g/s)    | CO (g/s)    | Opacity-based PM (g/s) | CO <sub>2</sub> (g/s) |
|---------------------------|----------------|-----------------------------|-------------|-------------|------------------------|-----------------------|
| B40<br><br>(3 replicates) | Low Idle       | 0.19 (0.05)                 | 0.23 (0.19) | 0.08 (0.07) | 0.01 (0.09)            | 7.79 (0.06)           |
|                           | High Idle      | 0.23 (0.02)                 | 0.31 (0.29) | 0.15 (0.47) | 0.01 (0.16)            | 12.6 (0.09)           |
|                           | 1              | 0.56 (0.03)                 | 0.07 (0.47) | 0.11 (0.35) | 0.02 (0.04)            | 34.1 (0.01)           |
|                           | 2              | 0.98 (0.02)                 | 0.06 (0.33) | 0.10 (0.30) | 0.02 (0.02)            | 49.9 (0.02)           |
|                           | 3              | 1.78 (0.03)                 | 0.07 (0.30) | 0.11 (0.33) | 0.03 (0.02)            | 88.0 (0.01)           |
|                           | 4              | 2.28 (0.01)                 | 0.06 (0.23) | 0.11 (0.49) | 0.04 (0.06)            | 119 (0.03)            |
|                           | 5              | 2.91 (0.02)                 | 0.06 (0.89) | 0.09 (0.18) | 0.05 (0.06)            | 163 (0.02)            |
|                           | 6              | 3.45 (0.06)                 | 0.59 (1.12) | 0.18 (0.27) | 0.06 (0.01)            | 199 (0.04)            |
|                           | 7              | 4.35 (0.03)                 | 0.48 (0.66) | 0.35 (0.15) | 0.11 (0.05)            | 294 (0.03)            |
|                           | 8              | 4.89 (0.04)                 | 0.22 (0.34) | 0.45 (0.25) | 0.15 (0.08)            | 386 (0.02)            |

Italicized values in parentheses are coefficients of variation (standard deviation divided by the mean) on the mean emission rate.

NO<sub>x</sub> includes NO and NO<sub>2</sub>. Only NO was measured. Results include multiplicative correction factors based on NO and NO<sub>2</sub> measurements of the prime mover engines in the rail yard with a SEMTECH-DS PEMS, temperature, and humidity.

HC is measured using non-dispersive infrared (NDIR), which accurately measures some compounds but responds only partially to others. Results include multiplicative correction factors based on FID measurements of the prime mover engines in the rail yard with a SEMTECH-DS PEMS.

Opacity is measured using a light scattering technique, which provides useful relative comparisons of particle levels in the exhaust. Results include multiplicative correction factor of 5 to approximate total PM.



**Table S8. Weights Used to Estimate Time-Based Fleet Average Emission Rates**

| Fuel | Locomotive | Rail Yard              |                                            | Over-the-Rail            |                                            |
|------|------------|------------------------|--------------------------------------------|--------------------------|--------------------------------------------|
|      |            | Number of Measurements | Weighting of Each Measurement <sup>a</sup> | Number of Measurements   | Weighting of Each Measurement <sup>a</sup> |
| ULSD | NC 1797    | 3                      | 1/9                                        | 6                        | 1/18                                       |
|      | NC 1810    | 3                      | 1/9                                        | 6                        | 1/18                                       |
|      | NC 1859    | 3                      | 1/9                                        | 6                        | 1/18                                       |
| B10  | NC 1797    | 3                      | 1/9                                        | 6                        | 1/18                                       |
|      | NC 1810    | 1                      | 1/3                                        | 6                        | 1/18                                       |
|      | NC 1859    | 3                      | 1/9                                        | 6                        | 1/18                                       |
| B20  | NC 1797    | 3                      | 1/9                                        | 5                        | 1/15                                       |
|      | NC 1810    | 1                      | 1/3                                        | 6                        | 1/18                                       |
|      | NC 1859    | 3                      | 1/9                                        | 15<br>PM: 9 <sup>b</sup> | 1/45<br>PM: 1/27                           |
| B40  | NC 1797    | 3                      | 1/9                                        | 6                        | 1/18                                       |
|      | NC 1810    | 1                      | 1/3                                        | 5                        | 1/15                                       |
|      | NC 1859    | 3                      | 1/9                                        | 6                        | 1/18                                       |

<sup>a</sup> For a given fuel, the sum of the weights for each locomotive is 1/3. This ensures that each locomotive is accounted for evenly in the fleet average emission rate.

<sup>b</sup> Only 9 measurements of PM were valid during over-the-rail measurements of NC 1859 on B20. There were 15 measurements of all other pollutants.

**Table S9. Time-Based Cycle Average Emission Rates from Rail Yard Measurement of Prime Mover Engines**

| Locomotive                    | Fuel | Cycle Average Emission Rate (g/s) |        |                 |        |      |        |                 |        |                 |        |
|-------------------------------|------|-----------------------------------|--------|-----------------|--------|------|--------|-----------------|--------|-----------------|--------|
|                               |      | NO <sub>x</sub> <sup>a</sup>      |        | HC <sup>b</sup> |        | CO   |        | PM <sup>c</sup> |        | CO <sub>2</sub> |        |
| NC 1797<br>(F59PHI)           | ULSD | 1.85                              | (0.01) | 0.31            | (0.49) | 0.13 | (0.19) | 0.04            | (0.09) | 106             | (0.06) |
|                               | B10  | 2.29                              | (0.02) | 1.10            | (0.30) | 0.14 | (0.05) | 0.04            | (0.08) | 118             | (0.01) |
|                               | B20  | 2.20                              | (0.03) | 1.27            | (0.15) | 0.13 | (0.17) | 0.03            | (0.10) | 101             | (0.04) |
|                               | B40  | 2.23                              | (0.00) | 0.39            | (0.28) | 0.14 | (0.42) | 0.04            | (0.20) | 116             | (0.05) |
| NC 1810<br>(F59PH)            | ULSD | 1.05                              | (0.01) | 1.35            | (0.10) | 0.24 | (0.06) | 0.07            | (0.10) | 107             | (0.00) |
|                               | B10  | 1.19                              |        | 0.40            |        | 0.28 |        | 0.07            |        | 111             |        |
|                               | B20  | 1.17                              |        | 0.28            |        | 0.14 |        | 0.03            |        | 97.1            |        |
|                               | B40  | 1.59                              |        | 0.25            |        | 0.13 |        | 0.08            |        | 86.1            |        |
|                               | B60  | 1.32                              | (0.07) | 0.16            | (1.00) | 0.16 | (0.55) | 0.04            | (0.15) | 110             | (0.05) |
|                               | B80  | 1.24                              | (0.01) | 0.10            | (0.89) | 0.15 | (0.04) | 0.11            | (0.11) | 105             | (0.05) |
|                               | B100 | 1.22                              | (0.02) | 0.89            | (0.47) | 0.08 | (0.08) | 0.06            | (0.34) | 116             | (0.00) |
| NC 1859<br>(F59PH)            | ULSD | 1.21                              | (0.02) | 2.57            | (0.15) | 0.50 | (0.18) | 0.07            | (0.06) | 105             | (0.05) |
|                               | B10  | 1.24                              | (0.04) | 0.28            | (0.41) | 0.08 | (0.37) | 0.05            | (0.16) | 105             | (0.00) |
|                               | B20  | 1.16                              | (0.03) | 0.35            | (0.41) | 0.10 | (0.09) | 0.05            | (0.09) | 101             | (0.02) |
|                               | B40  | 1.54                              | (0.04) | 0.25            | (0.21) | 0.16 | (0.30) | 0.04            | (0.09) | 101             | (0.04) |
| Fleet<br>Average <sup>d</sup> | ULSD | 1.37                              | (9%)   | 1.41            | (24%)  | 0.29 | (20%)  | 0.06            | (9%)   | 106             | (1%)   |
|                               | B10  | 1.60                              | (12%)  | 0.49            | (38%)  | 0.17 | (21%)  | 0.05            | (9%)   | 111             | (2%)   |
|                               | B20  | 1.53                              | (13%)  | 0.57            | (37%)  | 0.12 | (7%)   | 0.03            | (11%)  | 99.8            | (1%)   |
|                               | B40  | 1.70                              | (9%)   | 0.24            | (23%)  | 0.14 | (10%)  | 0.06            | (15%)  | 101             | (5%)   |

Italicized values in parentheses for each locomotive are coefficients of variation (standard deviation divided by the mean) on the mean emission rate. For the fleet average emission rates, the italicized values in parentheses are relative standard errors (standard error divided by the mean). Fleet average emission rate means and standard errors derived from one sample weighted t-tests.

<sup>a</sup> NO<sub>x</sub> includes NO and NO<sub>2</sub>. Only NO was measured. Results include multiplicative correction factors based on NO and NO<sub>2</sub> measurements of the prime mover engines in the rail yard with a SEMTECH-DS PEMS, temperature, and humidity.

<sup>b</sup> HC is measured using non-dispersive infrared (NDIR), which accurately measures some compounds but responds only partially to others. Results include multiplicative correction factors based on FID measurements of the prime mover engines in the rail yard with a SEMTECH-DS PEMS.

<sup>c</sup> Opacity is measured using a light scattering technique, which provides useful relative comparisons of particle levels in the exhaust. Results include multiplicative correction factor of 5 to approximate total PM.

<sup>d</sup> Fleet average emission rates based on equal weighting of each locomotive.

## Over-the-Rail Measurement Engine Parameters

**Table S10. Measured Notch Average Engine Performance Parameters from Over-the-Rail Measurement of Prime Mover Engines**

(a) NC 1797 – F59PHI Locomotive

| Fuel                   | Notch Position | Engine Output (kW) | Engine Speed (RPM) | IAT (K)    | MAP (kPa)  |
|------------------------|----------------|--------------------|--------------------|------------|------------|
| ULSD<br>(6 replicates) | Idle           | 7                  | 343 (0.00)         | 320 (0.00) | 106 (0.01) |
|                        | DB             | 7                  | 343 (0.00)         | 320 (0.01) | 106 (0.01) |
|                        | 1              | 142                | 343 (0.00)         | 321 (0.00) | 106 (0.00) |
|                        | 2              | 261                | 343 (0.00)         | 321 (0.00) | 106 (0.01) |
|                        | 3              | 503                | 490 (0.00)         | 321 (0.01) | 120 (0.01) |
|                        | 4              | 746                | 651 (0.00)         | 321 (0.00) | 144 (0.01) |
|                        | 5              | 969                | 750 (0.00)         | 321 (0.01) | 164 (0.01) |
|                        | 6              | 1,193              | 750 (0.00)         | 321 (0.00) | 165 (0.01) |
|                        | 7              | 2,013              | 819 (0.00)         | 321 (0.00) | 185 (0.01) |
| B10<br>(6 replicates)  | Idle           | 7                  | 343 (0.00)         | 317 (0.01) | 104 (0.01) |
|                        | DB             | 7                  | 340 (0.02)         | 317 (0.01) | 105 (0.01) |
|                        | 1              | 142                | 343 (0.00)         | 317 (0.01) | 105 (0.01) |
|                        | 2              | 261                | 343 (0.00)         | 317 (0.01) | 105 (0.01) |
|                        | 3              | 503                | 490 (0.00)         | 317 (0.01) | 119 (0.02) |
|                        | 4              | 746                | 651 (0.00)         | 318 (0.01) | 143 (0.02) |
|                        | 5              | 969                | 749 (0.00)         | 318 (0.01) | 164 (0.03) |
|                        | 6              | 1,193              | 749 (0.00)         | 317 (0.01) | 164 (0.02) |
|                        | 7              | 2,013              | 819 (0.00)         | 317 (0.01) | 185 (0.04) |
| B20<br>(5 replicates)  | Idle           | 7                  | 343 (0.00)         | 318 (0.01) | 104 (0.02) |
|                        | DB             | 7                  | 343 (0.00)         | 318 (0.01) | 104 (0.02) |
|                        | 1              | 142                | 343 (0.00)         | 318 (0.01) | 104 (0.02) |
|                        | 2              | 261                | 343 (0.00)         | 318 (0.01) | 104 (0.02) |
|                        | 3              | 503                | 490 (0.00)         | 318 (0.01) | 119 (0.02) |
|                        | 4              | 746                | 651 (0.00)         | 319 (0.01) | 143 (0.03) |
|                        | 5              | 969                | 749 (0.00)         | 319 (0.01) | 163 (0.03) |
|                        | 6              | 1,193              | 749 (0.00)         | 318 (0.01) | 164 (0.03) |
|                        | 7              | 2,013              | 821 (0.00)         | 319 (0.01) | 186 (0.03) |
| B40<br>(6 replicates)  | Idle           | 7                  | 343 (0.00)         | 326 (0.01) | 101 (0.01) |
|                        | DB             | 7                  | 343 (0.00)         | 326 (0.01) | 102 (0.01) |
|                        | 1              | 142                | 342 (0.00)         | 326 (0.00) | 101 (0.01) |
|                        | 2              | 261                | 343 (0.00)         | 327 (0.01) | 101 (0.01) |
|                        | 3              | 503                | 490 (0.00)         | 326 (0.01) | 115 (0.01) |
|                        | 4              | 746                | 651 (0.00)         | 326 (0.01) | 138 (0.01) |
|                        | 5              | 969                | 750 (0.00)         | 326 (0.00) | 157 (0.01) |
|                        | 6              | 1,193              | 750 (0.00)         | 327 (0.00) | 158 (0.01) |
|                        | 7              | 2,013              | 819 (0.00)         | 326 (0.00) | 174 (0.00) |
| B40<br>(6 replicates)  | 8              | 2,237              | 903 (0.00)         | 327 (0.01) | 202 (0.01) |

(b) NC 1810 – F59PH Locomotive

| Fuel                   | Notch Position | Engine Output (kW) | Engine Speed (RPM) | IAT (K)    | MAP (kPa)  |
|------------------------|----------------|--------------------|--------------------|------------|------------|
| ULSD<br>(6 replicates) | Low Idle       | 7                  | 238 (0.00)         | 339 (0.01) | 98 (0.01)  |
|                        | High Idle      | 7                  | 381 (0.00)         | 342 (0.01) | 107 (0.01) |
|                        | DB             | 7                  | 389 (0.05)         | 341 (0.01) | 108 (0.01) |
|                        | 1              | 142                | 380 (0.00)         | 341 (0.01) | 108 (0.01) |
|                        | 2              | 261                | 380 (0.00)         | 342 (0.01) | 108 (0.01) |
|                        | 3              | 503                | 489 (0.00)         | 342 (0.01) | 119 (0.01) |
|                        | 4              | 746                | 565 (0.00)         | 343 (0.01) | 130 (0.02) |
|                        | 5              | 969                | 654 (0.00)         | 344 (0.01) | 147 (0.03) |
|                        | 6              | 1,193              | 730 (0.00)         | 344 (0.01) | 159 (0.01) |
|                        | 7              | 2,013              | 826 (0.00)         | 346 (0.01) | 195 (0.03) |
|                        | 8              | 2,237              | 907 (0.00)         | 346 (0.01) | 244 (0.03) |
| B10<br>(6 replicate)   | Low Idle       | 7                  | 200 (0.01)         | 344 (0.00) | 101 (0.01) |
|                        | High Idle      | 7                  | 350 (0.00)         | 350 (0.01) | 109 (0.00) |
|                        | DB             | 7                  | 374 (0.08)         | 351 (0.01) | 110 (0.02) |
|                        | 1              | 142                | 350 (0.00)         | 350 (0.01) | 108 (0.01) |
|                        | 2              | 261                | 348 (0.00)         | 351 (0.01) | 110 (0.01) |
|                        | 3              | 503                | 493 (0.00)         | 352 (0.01) | 122 (0.01) |
|                        | 4              | 746                | 568 (0.00)         | 353 (0.00) | 131 (0.01) |
|                        | 5              | 969                | 650 (0.00)         | 354 (0.01) | 144 (0.02) |
|                        | 6              | 1,193              | 728 (0.00)         | 355 (0.01) | 159 (0.01) |
|                        | 7              | 2,013              | 823 (0.00)         | 355 (0.01) | 182 (0.01) |
|                        | 8              | 2,237              | 904 (0.00)         | 357 (0.01) | 228 (0.03) |
| B20<br>(6 replicate)   | Low Idle       | 7                  | 200 (0.01)         | 342 (0.01) | 101 (0.01) |
|                        | High Idle      | 7                  | 352 (0.00)         | 347 (0.00) | 108 (0.00) |
|                        | DB             | 7                  | 371 (0.09)         | 348 (0.01) | 110 (0.02) |
|                        | 1              | 142                | 351 (0.00)         | 348 (0.01) | 109 (0.01) |
|                        | 2              | 261                | 347 (0.00)         | 349 (0.01) | 109 (0.01) |
|                        | 3              | 503                | 494 (0.00)         | 350 (0.01) | 123 (0.01) |
|                        | 4              | 746                | 569 (0.00)         | 350 (0.01) | 133 (0.01) |
|                        | 5              | 969                | 651 (0.00)         | 352 (0.01) | 148 (0.02) |
|                        | 6              | 1,193              | 729 (0.00)         | 351 (0.01) | 162 (0.02) |
|                        | 7              | 2,013              | 823 (0.00)         | 355 (0.01) | 192 (0.06) |
|                        | 8              | 2,237              | 905 (0.00)         | 355 (0.01) | 236 (0.03) |
| B40<br>(5 replicates)  | Low Idle       | 7                  | 202 (0.00)         | 338 (0.00) | 101 (0.01) |
|                        | High Idle      | 7                  | 352 (0.00)         | 342 (0.01) | 110 (0.01) |
|                        | DB             | 7                  | 361 (0.02)         | 342 (0.01) | 110 (0.01) |
|                        | 1              | 142                | 352 (0.00)         | 342 (0.00) | 111 (0.01) |
|                        | 2              | 261                | 347 (0.01)         | 342 (0.01) | 111 (0.01) |
|                        | 3              | 503                | 495 (0.00)         | 344 (0.01) | 124 (0.02) |
|                        | 4              | 746                | 569 (0.00)         | 343 (0.01) | 134 (0.01) |
|                        | 5              | 969                | 652 (0.00)         | 347 (0.01) | 149 (0.02) |
|                        | 6              | 1,193              | 730 (0.00)         | 346 (0.01) | 164 (0.01) |
|                        | 7              | 2,013              | 822 (0.00)         | 348 (0.00) | 190 (0.03) |
|                        | 8              | 2,237              | 905 (0.00)         | 349 (0.00) | 233 (0.01) |

| Fuel                   | Notch Position | Engine Output (kW) | Engine Speed (RPM) | IAT (K)    | MAP (kPa)  |
|------------------------|----------------|--------------------|--------------------|------------|------------|
| B60<br>(6 replicates)  | Low Idle       | 7                  | 199 (0.01)         | 341 (0.01) | 99 (0.01)  |
|                        | High Idle      | 7                  | 347 (0.02)         | 344 (0.01) | 106 (0.01) |
|                        | DB             | 7                  | 376 (0.09)         | 345 (0.00) | 109 (0.03) |
|                        | 1              | 142                | 347 (0.02)         | 345 (0.01) | 107 (0.01) |
|                        | 2              | 261                | 346 (0.02)         | 346 (0.01) | 108 (0.01) |
|                        | 3              | 503                | 490 (0.01)         | 346 (0.01) | 122 (0.02) |
|                        | 4              | 746                | 567 (0.01)         | 345 (0.01) | 131 (0.02) |
|                        | 5              | 969                | 650 (0.00)         | 349 (0.01) | 145 (0.03) |
|                        | 6              | 1,193              | 729 (0.00)         | 348 (0.01) | 160 (0.03) |
|                        | 7              | 2,013              | 820 (0.01)         | 350 (0.02) | 195 (0.09) |
|                        | 8              | 2,237              | 903 (0.00)         | 350 (0.01) | 219 (0.05) |
| B80<br>(6 replicates)  | Low Idle       | 7                  | 197 (0.00)         | 336 (0.01) | 100 (0.01) |
|                        | High Idle      | 7                  | 339 (0.00)         | 342 (0.01) | 108 (0.01) |
|                        | DB             | 7                  | 364 (0.09)         | 343 (0.01) | 111 (0.02) |
|                        | 1              | 142                | 338 (0.00)         | 342 (0.01) | 109 (0.01) |
|                        | 2              | 261                | 338 (0.00)         | 344 (0.01) | 109 (0.01) |
|                        | 3              | 503                | 488 (0.00)         | 343 (0.01) | 123 (0.01) |
|                        | 4              | 746                | 562 (0.00)         | 344 (0.01) | 133 (0.01) |
|                        | 5              | 969                | 650 (0.00)         | 345 (0.01) | 147 (0.01) |
|                        | 6              | 1,193              | 726 (0.00)         | 345 (0.01) | 162 (0.02) |
|                        | 7              | 2,013              | 821 (0.00)         | 346 (0.01) | 188 (0.02) |
|                        | 8              | 2,237              | 900 (0.00)         | 347 (0.01) | 226 (0.03) |
| B100<br>(4 replicates) | Low Idle       | 7                  | 197 (0.00)         | 337 (0.00) | 99 (0.00)  |
|                        | High Idle      | 7                  | 338 (0.00)         | 340 (0.00) | 107 (0.01) |
|                        | DB             | 7                  | 351 (0.07)         | 340 (0.00) | 109 (0.02) |
|                        | 1              | 142                | 338 (0.00)         | 340 (0.01) | 107 (0.01) |
|                        | 2              | 261                | 338 (0.00)         | 338 (0.00) | 107 (0.01) |
|                        | 3              | 503                | 488 (0.00)         | 340 (0.00) | 121 (0.01) |
|                        | 4              | 746                | 562 (0.00)         | 339 (0.01) | 131 (0.01) |
|                        | 5              | 969                | 649 (0.00)         | 342 (0.00) | 146 (0.01) |
|                        | 6              | 1,193              | 725 (0.00)         | 343 (0.01) | 162 (0.01) |
|                        | 7              | 2,013              | 820 (0.00)         | 344 (0.01) | 191 (0.01) |
|                        | 8              | 2,237              | 901 (0.00)         | 346 (0.00) | 227 (0.04) |

(c) NC 1859 – F59PH Locomotive

| Fuel                   | Notch Position | Engine Output (kW) | Engine Speed (RPM) | IAT (K)    | MAP (kPa)  |
|------------------------|----------------|--------------------|--------------------|------------|------------|
| ULSD<br>(6 replicates) | Low Idle       | 7                  | 237 (0.00)         | 343 (0.01) | 100 (0.00) |
|                        | High Idle      | 7                  | 369 (0.00)         | 348 (0.01) | 108 (0.01) |
|                        | DB             | 7                  | 386 (0.04)         | 348 (0.01) | 109 (0.01) |
|                        | 1              | 142                | 369 (0.00)         | 349 (0.00) | 110 (0.01) |
|                        | 2              | 261                | 369 (0.00)         | 347 (0.01) | 110 (0.01) |
|                        | 3              | 503                | 491 (0.00)         | 348 (0.01) | 122 (0.02) |
|                        | 4              | 746                | 564 (0.00)         | 349 (0.01) | 132 (0.02) |
|                        | 5              | 969                | 651 (0.00)         | 350 (0.01) | 146 (0.02) |
|                        | 6              | 1,193              | 728 (0.00)         | 350 (0.01) | 160 (0.01) |
|                        | 7              | 2,013              | 819 (0.00)         | 350 (0.01) | 179 (0.01) |
|                        | 8              | 2,237              | 902 (0.00)         | 352 (0.01) | 227 (0.02) |
| B10<br>(6 replicates)  | Low Idle       | 7                  | 238 (0.00)         | 334 (0.01) | 101 (0.01) |
|                        | High Idle      | 7                  | 371 (0.00)         | 338 (0.01) | 110 (0.02) |
|                        | DB             | 7                  | 382 (0.04)         | 337 (0.01) | 111 (0.02) |
|                        | 1              | 142                | 370 (0.00)         | 337 (0.01) | 110 (0.02) |
|                        | 2              | 261                | 371 (0.00)         | 337 (0.01) | 111 (0.02) |
|                        | 3              | 503                | 493 (0.00)         | 338 (0.01) | 123 (0.02) |
|                        | 4              | 746                | 565 (0.00)         | 340 (0.01) | 134 (0.02) |
|                        | 5              | 969                | 653 (0.00)         | 341 (0.01) | 151 (0.04) |
|                        | 6              | 1,193              | 730 (0.00)         | 343 (0.01) | 167 (0.03) |
|                        | 7              | 2,013              | 820 (0.00)         | 345 (0.01) | 198 (0.06) |
|                        | 8              | 2,237              | 903 (0.00)         | 343 (0.01) | 235 (0.05) |
| B20<br>(15 replicates) | Low Idle       | 7                  | 238 (0.00)         | 336 (0.01) | 100 (0.02) |
|                        | High Idle      | 7                  | 371 (0.00)         | 339 (0.01) | 109 (0.02) |
|                        | DB             | 7                  | 377 (0.03)         | 339 (0.01) | 110 (0.02) |
|                        | 1              | 142                | 371 (0.00)         | 338 (0.01) | 110 (0.02) |
|                        | 2              | 261                | 372 (0.01)         | 339 (0.01) | 110 (0.02) |
|                        | 3              | 503                | 493 (0.00)         | 339 (0.01) | 123 (0.02) |
|                        | 4              | 746                | 564 (0.00)         | 340 (0.01) | 133 (0.02) |
|                        | 5              | 969                | 653 (0.00)         | 341 (0.01) | 148 (0.03) |
|                        | 6              | 1,193              | 729 (0.00)         | 342 (0.01) | 164 (0.02) |
|                        | 7              | 2,013              | 820 (0.00)         | 344 (0.01) | 194 (0.05) |
|                        | 8              | 2,237              | 903 (0.00)         | 343 (0.00) | 233 (0.03) |
| B40<br>(6 replicates)  | Low Idle       | 7                  | 237 (0.00)         | 338 (0.01) | 99 (0.01)  |
|                        | High Idle      | 7                  | 370 (0.00)         | 342 (0.00) | 107 (0.00) |
|                        | DB             | 7                  | 378 (0.03)         | 341 (0.00) | 109 (0.01) |
|                        | 1              | 142                | 370 (0.00)         | 342 (0.01) | 108 (0.01) |
|                        | 2              | 261                | 369 (0.00)         | 340 (0.01) | 109 (0.01) |
|                        | 3              | 503                | 491 (0.00)         | 341 (0.01) | 120 (0.01) |
|                        | 4              | 746                | 564 (0.00)         | 342 (0.01) | 130 (0.01) |
|                        | 5              | 969                | 651 (0.00)         | 343 (0.01) | 145 (0.01) |
|                        | 6              | 1,193              | 729 (0.00)         | 344 (0.01) | 160 (0.01) |
|                        | 7              | 2,013              | 819 (0.00)         | 346 (0.01) | 187 (0.05) |
|                        | 8              | 2,237              | 902 (0.00)         | 346 (0.00) | 225 (0.03) |

Italicized values in parentheses are coefficients of variation on the mean emission rate.

### Over-the-Rail Measurement Emission Rates

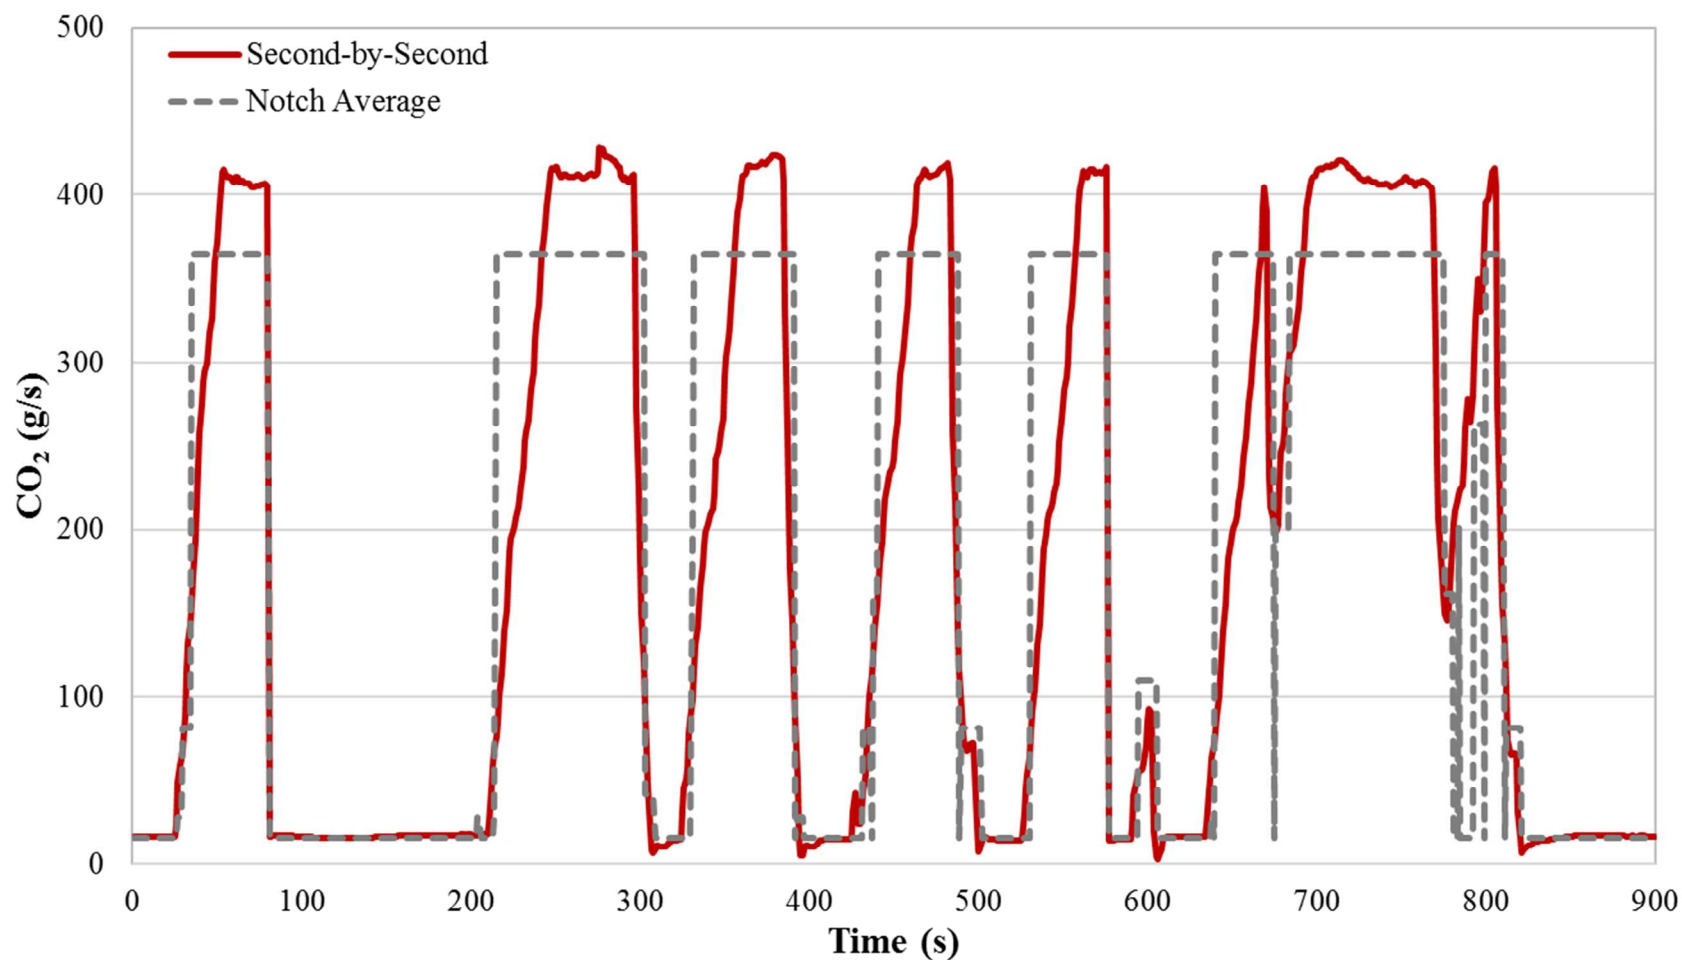

**Figure S10. Time Trace of PEMS-Measured Time-Based CO<sub>2</sub> Emission Rate for a 900-Second Segment of a One-Way Piedmont Trip by Locomotive NC 1859 on Ultra-Low Sulfur Diesel**

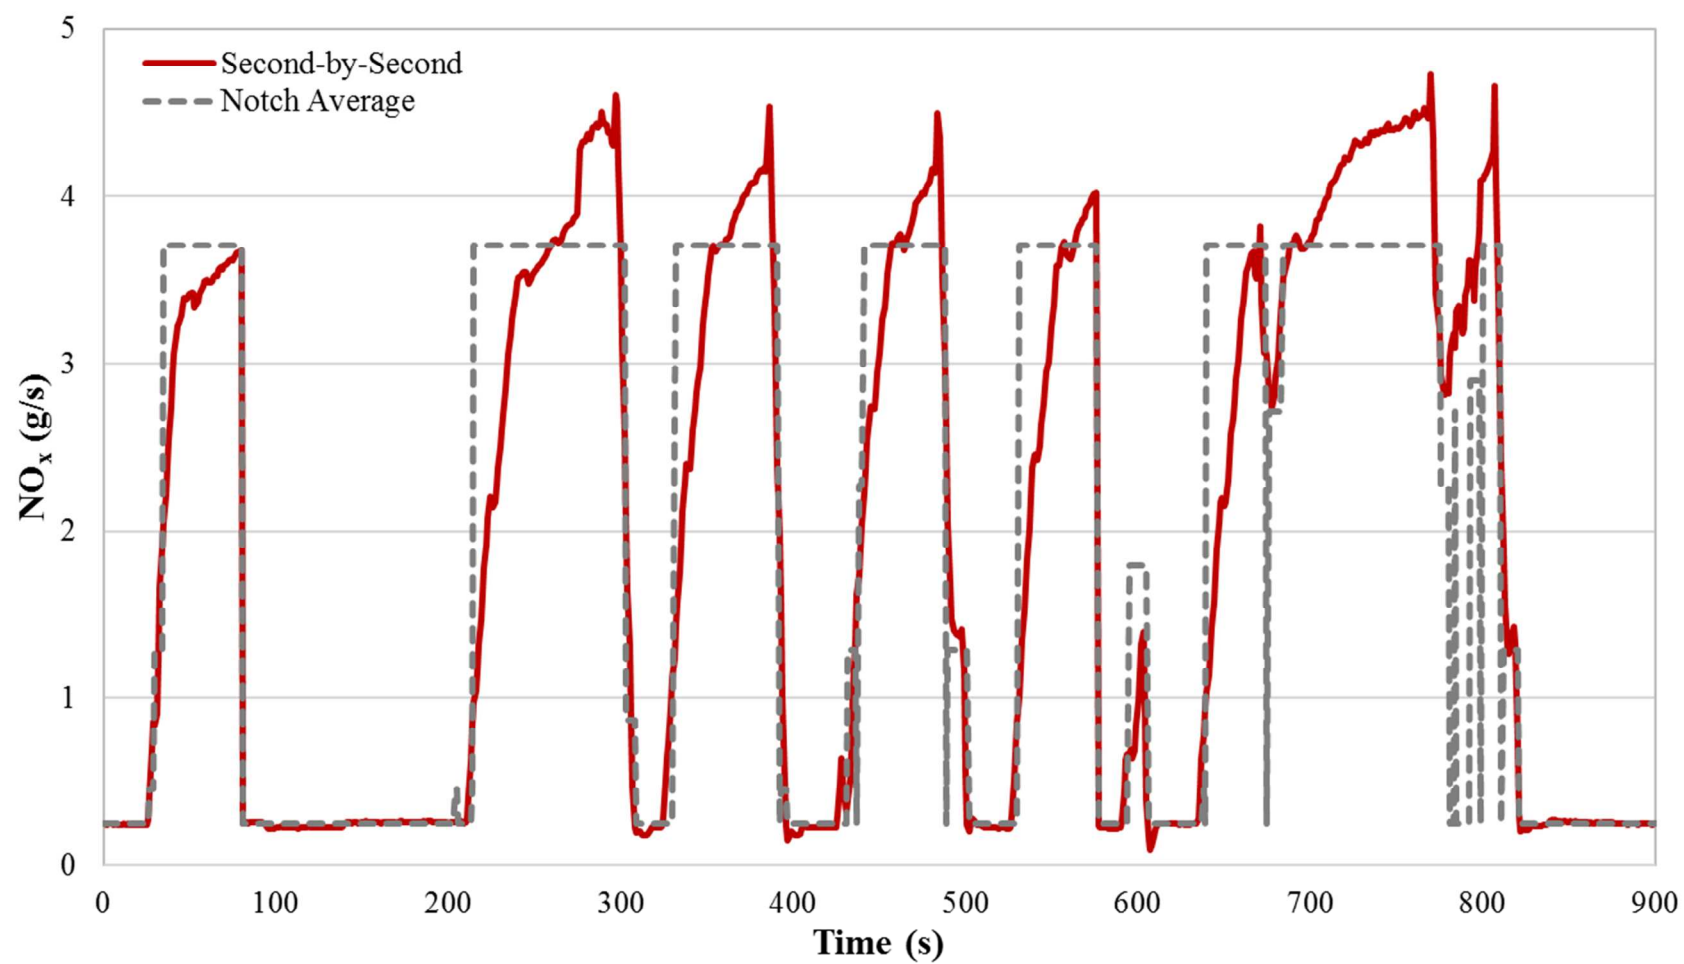

**Figure S11. Time Trace of PEMS-Measured Time-Based NO<sub>x</sub> Emission Rate for a 900-Second Segment of a One-Way Piedmont Trip by Locomotive NC 1859 on Ultra-Low Sulfur Diesel**



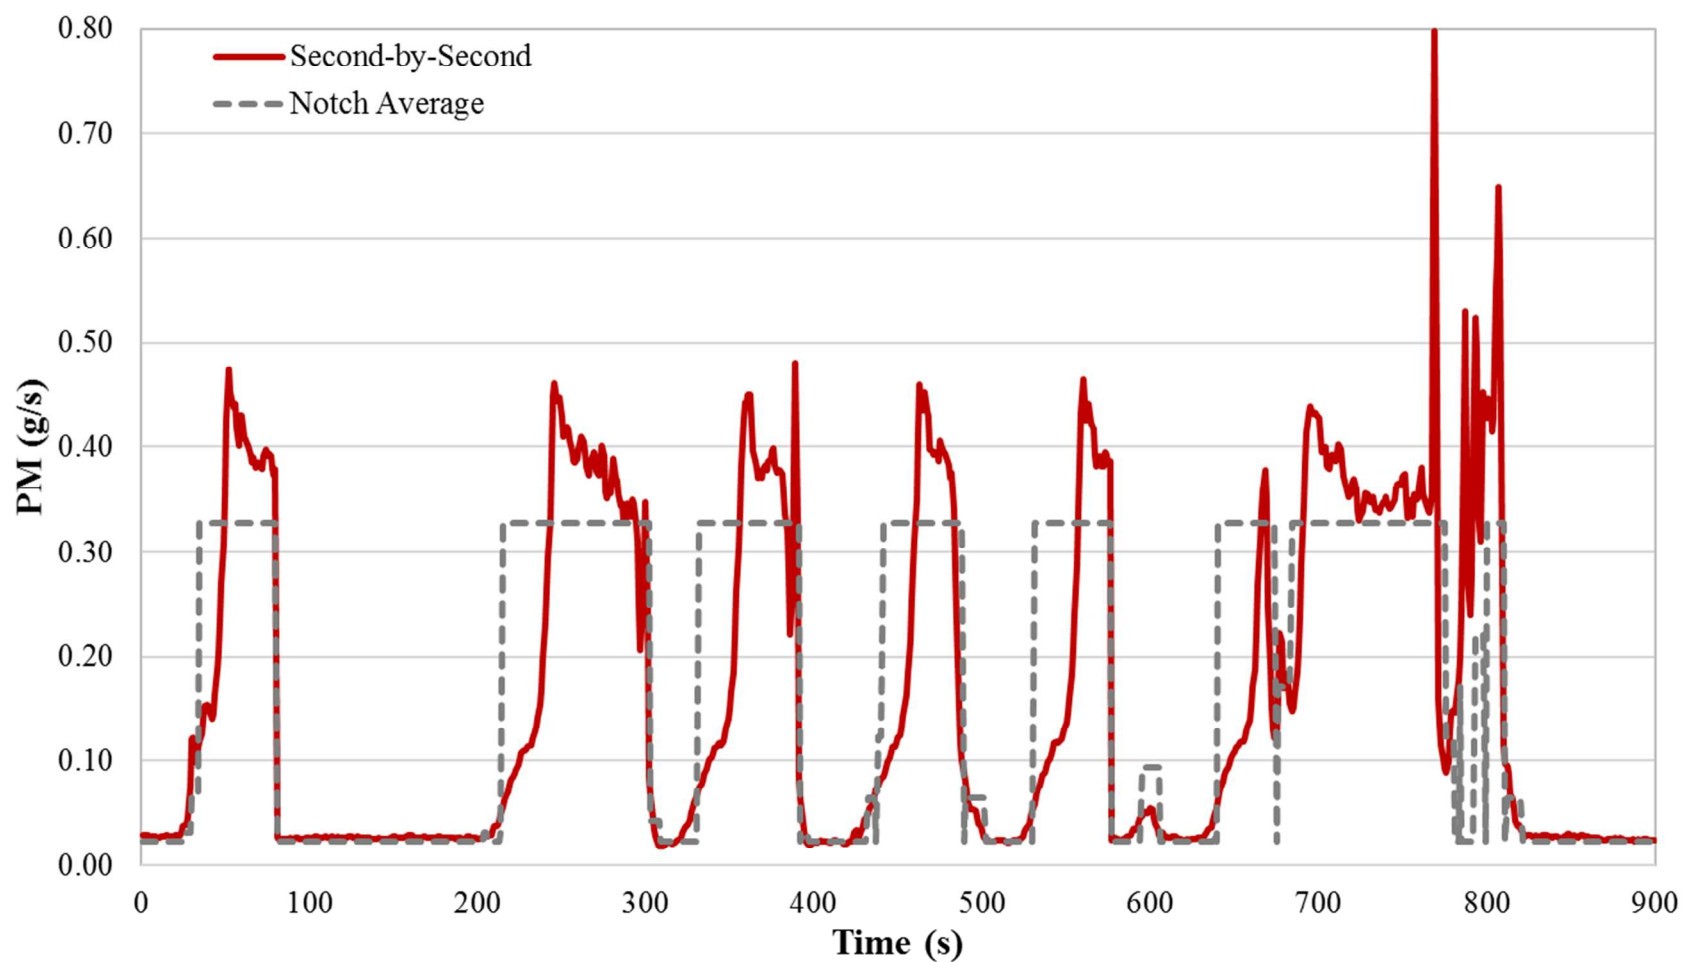

**Figure S12. Time Trace of PEMS-Measured Time-Based PM Emission Rate for a 900-Second Segment of a One-Way Piedmont Trip by Locomotive NC 1859 on Ultra-Low Sulfur Diesel**

**Table S11. Time-Based Notch Average Emission Rates from Over-the-Rail Measurements of Prime Mover Engines**

(a) NC 1797 – F59PHI Locomotive

| Fuel                   | Notch Position | NO as NO <sub>2</sub> (g/s) | HC (g/s)    | CO (g/s)    | Opacity-based PM (g/s) | CO <sub>2</sub> (g/s) |
|------------------------|----------------|-----------------------------|-------------|-------------|------------------------|-----------------------|
| ULSD<br>(6 replicates) | Idle           | 0.46 (0.10)                 | 0.10 (0.59) | 0.09 (0.59) | 0.01 (0.08)            | 12.8 (0.19)           |
|                        | Dynamic Brake  | 0.46 (0.14)                 | 0.13 (1.00) | 0.12 (1.00) | 0.01 (0.17)            | 13.3 (0.14)           |
|                        | 1              | 0.96 (0.14)                 | 0.08 (0.58) | 0.06 (0.58) | 0.02 (0.11)            | 26.8 (0.21)           |
|                        | 2              | 1.51 (0.20)                 | 0.08 (0.54) | 0.07 (0.54) | 0.02 (0.05)            | 41.5 (0.27)           |
|                        | 3              | 3.29 (0.08)                 | 0.10 (0.65) | 0.09 (0.65) | 0.02 (0.14)            | 75.8 (0.15)           |
|                        | 4              | 4.66 (0.08)                 | 0.12 (0.43) | 0.14 (0.43) | 0.02 (0.13)            | 122 (0.10)            |
|                        | 5              | 5.63 (0.09)                 | 0.22 (0.31) | 0.16 (0.31) | 0.03 (0.26)            | 162 (0.08)            |
|                        | 6              | 5.02 (0.06)                 | 0.29 (0.84) | 0.19 (0.84) | 0.03 (0.15)            | 191 (0.09)            |
|                        | 7              | 5.62 (0.16)                 | 0.35 (0.79) | 0.31 (0.79) | 0.09 (0.31)            | 251 (0.28)            |
|                        | 8              | 6.68 (0.04)                 | 1.10 (0.21) | 0.54 (0.21) | 0.12 (0.10)            | 359 (0.07)            |
| B10<br>(6 replicates)  | Idle           | 0.43 (0.17)                 | 0.14 (0.29) | 0.06 (0.29) | 0.01 (0.04)            | 14.6 (0.11)           |
|                        | Dynamic Brake  | 0.44 (0.18)                 | 0.16 (0.21) | 0.08 (0.21) | 0.01 (0.05)            | 14.8 (0.08)           |
|                        | 1              | 0.99 (0.24)                 | 0.04 (0.52) | 0.05 (0.52) | 0.01 (0.04)            | 33.2 (0.13)           |
|                        | 2              | 1.39 (0.23)                 | 0.04 (0.72) | 0.05 (0.72) | 0.02 (0.08)            | 44.8 (0.15)           |
|                        | 3              | 3.16 (0.17)                 | 0.03 (0.46) | 0.04 (0.46) | 0.02 (0.04)            | 89.2 (0.08)           |
|                        | 4              | 4.30 (0.21)                 | 0.04 (0.73) | 0.06 (0.73) | 0.03 (0.12)            | 134 (0.06)            |
|                        | 5              | 5.22 (0.12)                 | 0.07 (0.74) | 0.09 (0.74) | 0.03 (0.07)            | 175 (0.08)            |
|                        | 6              | 5.46 (0.11)                 | 0.05 (0.85) | 0.07 (0.85) | 0.03 (0.09)            | 194 (0.14)            |
|                        | 7              | 5.95 (0.11)                 | 0.28 (0.81) | 0.19 (0.81) | 0.09 (0.38)            | 280 (0.20)            |
|                        | 8              | 6.66 (0.11)                 | 0.59 (0.59) | 0.26 (0.59) | 0.14 (0.13)            | 385 (0.02)            |

| Fuel                  | Notch Position | NO as NO <sub>2</sub> (g/s) | HC (g/s)    | CO (g/s)    | Opacity-based PM (g/s) | CO <sub>2</sub> (g/s) |
|-----------------------|----------------|-----------------------------|-------------|-------------|------------------------|-----------------------|
| B20<br>(5 replicates) | Idle           | 0.38 (0.06)                 | 0.02 (0.98) | 0.02 (0.98) | 0.01 (0.09)            | 12.4 (0.11)           |
|                       | Dynamic Brake  | 0.35 (0.13)                 | 0.02 (1.78) | 0.02 (1.78) | 0.01 (0.08)            | 11.8 (0.14)           |
|                       | 1              | 0.80 (0.10)                 | 0.01 (1.50) | 0.01 (1.50) | 0.01 (0.07)            | 25.8 (0.18)           |
|                       | 2              | 1.35 (0.09)                 | 0.01 (1.09) | 0.01 (1.09) | 0.01 (0.07)            | 41.6 (0.16)           |
|                       | 3              | 2.65 (0.09)                 | 0.01 (1.76) | 0.01 (1.76) | 0.02 (0.07)            | 77.6 (0.14)           |
|                       | 4              | 3.79 (0.07)                 | 0.01 (1.44) | 0.02 (1.44) | 0.02 (0.05)            | 112 (0.10)            |
|                       | 5              | 4.90 (0.09)                 | 0.01 (1.20) | 0.01 (1.20) | 0.02 (0.10)            | 153 (0.12)            |
|                       | 6              | 4.91 (0.05)                 | 0.01 (1.70) | 0.01 (1.70) | 0.02 (0.06)            | 174 (0.11)            |
|                       | 7              | 5.85 (0.07)                 | 0.01 (0.88) | 0.02 (0.88) | 0.09 (0.16)            | 285 (0.15)            |
|                       | 8              | 6.28 (0.03)                 | 0.20 (0.30) | 0.13 (0.30) | 0.10 (0.21)            | 347 (0.05)            |
| B40<br>(6 replicates) | Idle           | 0.69 (0.13)                 | 0.17 (0.76) | 0.16 (0.76) | 0.01 (0.37)            | 16.2 (0.03)           |
|                       | Dynamic Brake  | 0.63 (0.09)                 | 0.27 (0.58) | 0.26 (0.58) | 0.01 (0.33)            | 16.0 (0.05)           |
|                       | 1              | 1.41 (0.15)                 | 0.05 (0.62) | 0.09 (0.62) | 0.01 (0.19)            | 35.4 (0.11)           |
|                       | 2              | 2.05 (0.15)                 | 0.06 (0.60) | 0.11 (0.60) | 0.01 (0.25)            | 49.1 (0.12)           |
|                       | 3              | 4.24 (0.05)                 | 0.07 (0.72) | 0.12 (0.72) | 0.02 (0.26)            | 93.6 (0.03)           |
|                       | 4              | 5.86 (0.11)                 | 0.09 (0.76) | 0.16 (0.76) | 0.03 (0.38)            | 137 (0.06)            |
|                       | 5              | 7.12 (0.11)                 | 0.09 (0.68) | 0.15 (0.68) | 0.05 (0.51)            | 182 (0.06)            |
|                       | 6              | 7.42 (0.14)                 | 0.08 (1.03) | 0.11 (1.03) | 0.05 (0.51)            | 208 (0.07)            |
|                       | 7              | 8.24 (0.04)                 | 0.18 (0.60) | 0.14 (0.60) | 0.25 (1.05)            | 254 (0.06)            |
|                       | 8              | 8.29 (0.05)                 | 0.91 (0.24) | 0.46 (0.24) | 0.22 (0.23)            | 389 (0.02)            |

(b) NC 1810 – F59PH Locomotive

| Fuel                   | Notch Position | NO as NO <sub>2</sub> (g/s) | HC (g/s)    | CO (g/s)    | Opacity-based PM (g/s) | CO <sub>2</sub> (g/s) |
|------------------------|----------------|-----------------------------|-------------|-------------|------------------------|-----------------------|
| ULSD<br>(6 replicates) | Low Idle       | 0.15 (0.14)                 | 0.13 (0.31) | 0.06 (0.31) | 0.01 (0.10)            | 8.45 (0.08)           |
|                        | High Idle      | 0.24 (0.13)                 | 0.19 (0.29) | 0.09 (0.29) | 0.01 (0.04)            | 16.2 (0.10)           |
|                        | Dynamic Brake  | 0.24 (0.14)                 | 0.22 (0.49) | 0.11 (0.49) | 0.01 (0.05)            | 16.8 (0.11)           |
|                        | 1              | 0.44 (0.11)                 | 0.21 (0.39) | 0.10 (0.39) | 0.01 (0.04)            | 30.5 (0.08)           |
|                        | 2              | 0.70 (0.13)                 | 0.13 (0.19) | 0.09 (0.19) | 0.02 (0.06)            | 45.5 (0.07)           |
|                        | 3              | 1.34 (0.10)                 | 0.16 (0.35) | 0.12 (0.35) | 0.03 (0.08)            | 85.8 (0.05)           |
|                        | 4              | 1.81 (0.09)                 | 0.18 (0.40) | 0.15 (0.40) | 0.06 (0.09)            | 125 (0.04)            |
|                        | 5              | 2.29 (0.07)                 | 0.30 (0.52) | 0.26 (0.52) | 0.07 (0.19)            | 168 (0.06)            |
|                        | 6              | 2.69 (0.06)                 | 0.36 (0.50) | 0.33 (0.50) | 0.09 (0.15)            | 215 (0.04)            |
|                        | 7              | 3.18 (0.17)                 | 1.64 (0.53) | 0.82 (0.53) | 0.20 (0.22)            | 301 (0.05)            |
|                        | 8              | 3.72 (0.05)                 | 3.46 (0.26) | 1.30 (0.26) | 0.25 (0.11)            | 407 (0.02)            |
| B10<br>(6 replicate)   | Low Idle       | 0.16 (0.21)                 | 0.01 (1.44) | 0.01 (1.45) | 0.01 (0.14)            | 6.83 (0.41)           |
|                        | High Idle      | 0.25 (0.09)                 | 0.07 (0.25) | 0.03 (0.25) | 0.01 (0.16)            | 15.1 (0.16)           |
|                        | Dynamic Brake  | 0.22 (0.10)                 | 0.07 (0.50) | 0.03 (0.50) | 0.01 (0.20)            | 14.3 (0.07)           |
|                        | 1              | 0.39 (0.19)                 | 0.06 (0.49) | 0.05 (0.49) | 0.02 (0.12)            | 26.6 (0.21)           |
|                        | 2              | 0.63 (0.21)                 | 0.06 (0.41) | 0.05 (0.41) | 0.03 (0.08)            | 40.7 (0.19)           |
|                        | 3              | 1.15 (0.13)                 | 0.09 (0.32) | 0.08 (0.32) | 0.05 (0.11)            | 74.4 (0.17)           |
|                        | 4              | 1.52 (0.15)                 | 0.16 (0.31) | 0.14 (0.31) | 0.09 (0.19)            | 108 (0.15)            |
|                        | 5              | 1.99 (0.07)                 | 0.26 (0.40) | 0.23 (0.40) | 0.14 (0.16)            | 153 (0.13)            |
|                        | 6              | 2.42 (0.04)                 | 0.39 (0.17) | 0.32 (0.18) | 0.18 (0.13)            | 204 (0.04)            |
|                        | 7              | 2.80 (0.04)                 | 1.82 (0.43) | 1.02 (0.43) | 0.30 (0.31)            | 287 (0.08)            |
|                        | 8              | 3.17 (0.05)                 | 6.33 (0.17) | 2.25 (0.17) | 0.38 (0.05)            | 387 (0.04)            |

| Fuel                  | Notch Position | NO as NO <sub>2</sub> (g/s) | HC (g/s)    | CO (g/s)    | Opacity-based PM (g/s) | CO <sub>2</sub> (g/s) |
|-----------------------|----------------|-----------------------------|-------------|-------------|------------------------|-----------------------|
| B20<br>(6 replicate)  | Low Idle       | 0.13 (0.11)                 | 0.01 (0.64) | 0.01 (0.64) | 0.01 (0.30)            | 6.71 (0.18)           |
|                       | High Idle      | 0.24 (0.08)                 | 0.03 (0.24) | 0.03 (0.24) | 0.01 (0.20)            | 14.8 (0.10)           |
|                       | Dynamic Brake  | 0.22 (0.12)                 | 0.03 (0.22) | 0.03 (0.22) | 0.01 (0.19)            | 15.8 (0.15)           |
|                       | 1              | 0.47 (0.12)                 | 0.02 (0.37) | 0.04 (0.37) | 0.02 (0.10)            | 28.0 (0.14)           |
|                       | 2              | 0.61 (0.15)                 | 0.02 (0.19) | 0.04 (0.19) | 0.03 (0.15)            | 37.1 (0.19)           |
|                       | 3              | 1.06 (0.17)                 | 0.04 (0.36) | 0.07 (0.36) | 0.04 (0.11)            | 67.4 (0.23)           |
|                       | 4              | 1.50 (0.12)                 | 0.05 (0.66) | 0.09 (0.66) | 0.07 (0.10)            | 97.3 (0.17)           |
|                       | 5              | 2.04 (0.07)                 | 0.09 (0.43) | 0.16 (0.43) | 0.09 (0.08)            | 146 (0.10)            |
|                       | 6              | 2.45 (0.07)                 | 0.15 (0.63) | 0.28 (0.63) | 0.11 (0.19)            | 181 (0.08)            |
|                       | 7              | 3.22 (0.13)                 | 0.38 (0.16) | 0.51 (0.52) | 0.18 (0.55)            | 282 (0.08)            |
|                       | 8              | 3.52 (0.08)                 | 1.93 (0.21) | 1.22 (0.21) | 0.21 (0.20)            | 370 (0.06)            |
| B40<br>(5 replicates) | Low Idle       | 0.17 (0.15)                 | 0.02 (0.60) | 0.01 (0.60) | 0.01 (0.30)            | 8.64 (0.32)           |
|                       | High Idle      | 0.29 (0.20)                 | 0.03 (0.25) | 0.03 (0.25) | 0.02 (0.25)            | 20.4 (0.23)           |
|                       | Dynamic Brake  | 0.24 (0.16)                 | 0.03 (0.53) | 0.02 (0.53) | 0.03 (0.24)            | 18.6 (0.24)           |
|                       | 1              | 0.38 (0.08)                 | 0.03 (0.47) | 0.04 (0.47) | 0.03 (0.09)            | 28.7 (0.29)           |
|                       | 2              | 0.46 (0.13)                 | 0.03 (0.23) | 0.03 (0.23) | 0.02 (0.27)            | 36.7 (0.18)           |
|                       | 3              | 0.92 (0.11)                 | 0.05 (0.51) | 0.06 (0.51) | 0.04 (0.21)            | 65.2 (0.19)           |
|                       | 4              | 1.35 (0.21)                 | 0.06 (0.33) | 0.08 (0.33) | 0.05 (0.09)            | 90.0 (0.19)           |
|                       | 5              | 1.90 (0.13)                 | 0.10 (0.24) | 0.13 (0.24) | 0.08 (0.12)            | 134 (0.18)            |
|                       | 6              | 2.38 (0.09)                 | 0.10 (0.42) | 0.13 (0.42) | 0.10 (0.13)            | 166 (0.27)            |
|                       | 7              | 2.99 (0.05)                 | 0.23 (0.67) | 0.19 (0.92) | 0.11 (0.65)            | 256 (0.09)            |
|                       | 8              | 3.09 (0.13)                 | 1.70 (0.16) | 0.76 (0.16) | 0.23 (0.06)            | 364 (0.12)            |

| Fuel                  | Notch Position | NO as NO <sub>2</sub> (g/s) | HC (g/s)    | CO (g/s)    | Opacity-based PM (g/s) | CO <sub>2</sub> (g/s) |
|-----------------------|----------------|-----------------------------|-------------|-------------|------------------------|-----------------------|
| B60<br>(6 replicates) | Low Idle       | 0.15 (0.27)                 | 0.21 (1.27) | 0.22 (1.23) | 0.01 (0.38)            | 6.74 (0.19)           |
|                       | High Idle      | 0.24 (0.20)                 | 0.21 (0.88) | 0.22 (0.85) | 0.02 (0.42)            | 12.5 (0.10)           |
|                       | Dynamic Brake  | 0.26 (0.14)                 | 0.23 (1.14) | 0.24 (1.11) | 0.02 (0.44)            | 14.6 (0.12)           |
|                       | 1              | 0.51 (0.22)                 | 0.07 (0.59) | 0.14 (0.59) | 0.03 (0.36)            | 26.8 (0.12)           |
|                       | 2              | 0.82 (0.18)                 | 0.06 (0.73) | 0.13 (0.73) | 0.04 (0.32)            | 39.1 (0.10)           |
|                       | 3              | 1.62 (0.18)                 | 0.11 (0.82) | 0.12 (0.82) | 0.06 (0.41)            | 79.3 (0.09)           |
|                       | 4              | 2.05 (0.14)                 | 0.20 (0.91) | 0.42 (0.91) | 0.09 (0.37)            | 116 (0.08)            |
|                       | 5              | 2.71 (0.15)                 | 0.30 (1.54) | 0.62 (1.55) | 0.13 (0.42)            | 157 (0.11)            |
|                       | 6              | 3.10 (0.21)                 | 0.27 (1.62) | 0.55 (1.62) | 0.16 (0.48)            | 198 (0.17)            |
|                       | 7              | 3.73 (0.17)                 | 0.32 (1.32) | 0.41 (1.32) | 0.20 (0.63)            | 273 (0.27)            |
|                       | 8              | 4.33 (0.15)                 | 1.47 (0.47) | 0.87 (0.47) | 0.39 (0.46)            | 373 (0.06)            |
| B80<br>(6 replicates) | Low Idle       | 0.09 (0.58)                 | 0.04 (0.58) | 0.02 (0.58) | 0.01 (0.17)            | 5.02 (0.55)           |
|                       | High Idle      | 0.19 (0.16)                 | 0.07 (0.34) | 0.05 (0.34) | 0.01 (0.09)            | 12.4 (0.14)           |
|                       | Dynamic Brake  | 0.21 (0.29)                 | 0.07 (0.40) | 0.05 (0.40) | 0.01 (0.13)            | 14.4 (0.29)           |
|                       | 1              | 0.35 (0.36)                 | 0.03 (0.49) | 0.04 (0.49) | 0.01 (0.13)            | 21.4 (0.35)           |
|                       | 2              | 0.54 (0.34)                 | 0.03 (0.28) | 0.04 (0.28) | 0.02 (0.18)            | 34.7 (0.28)           |
|                       | 3              | 1.14 (0.32)                 | 0.04 (0.52) | 0.05 (0.52) | 0.03 (0.10)            | 72.4 (0.27)           |
|                       | 4              | 1.54 (0.30)                 | 0.06 (0.21) | 0.07 (0.21) | 0.04 (0.06)            | 108 (0.21)            |
|                       | 5              | 2.12 (0.25)                 | 0.06 (0.72) | 0.08 (0.72) | 0.05 (0.08)            | 157 (0.20)            |
|                       | 6              | 2.56 (0.22)                 | 0.16 (0.55) | 0.17 (0.55) | 0.08 (0.23)            | 205 (0.19)            |
|                       | 7              | 3.26 (0.17)                 | 0.43 (0.11) | 0.28 (0.11) | 0.22 (0.16)            | 304 (0.11)            |
|                       | 8              | 3.87 (0.09)                 | 1.28 (0.34) | 0.39 (0.34) | 0.25 (0.10)            | 391 (0.04)            |

| Fuel                   | Notch Position | NO as NO <sub>2</sub> (g/s) | HC (g/s)    | CO (g/s)    | Opacity-based PM (g/s) | CO <sub>2</sub> (g/s) |
|------------------------|----------------|-----------------------------|-------------|-------------|------------------------|-----------------------|
| B100<br>(4 replicates) | Low Idle       | 0.15 (0.14)                 | 0.12 (0.27) | 0.05 (0.27) | 0.01 (0.08)            | 8.53 (0.09)           |
|                        | High Idle      | 0.25 (0.11)                 | 0.21 (0.20) | 0.08 (0.20) | 0.01 (0.13)            | 15.9 (0.07)           |
|                        | Dynamic Brake  | 0.26 (0.16)                 | 0.26 (0.33) | 0.10 (0.33) | 0.01 (0.19)            | 16.8 (0.17)           |
|                        | 1              | 0.47 (0.15)                 | 0.28 (0.32) | 0.10 (0.32) | 0.01 (0.17)            | 32.5 (0.12)           |
|                        | 2              | 0.62 (0.24)                 | 0.20 (0.42) | 0.09 (0.42) | 0.02 (0.20)            | 42.8 (0.20)           |
|                        | 3              | 1.36 (0.12)                 | 0.13 (0.30) | 0.09 (0.30) | 0.03 (0.27)            | 92.2 (0.07)           |
|                        | 4              | 1.79 (0.04)                 | 0.17 (0.40) | 0.11 (0.40) | 0.04 (0.18)            | 130 (0.01)            |
|                        | 5              | 2.30 (0.04)                 | 0.21 (0.64) | 0.13 (0.64) | 0.05 (0.05)            | 179 (0.01)            |
|                        | 6              | 2.79 (0.03)                 | 0.20 (0.31) | 0.14 (0.31) | 0.07 (0.08)            | 227 (0.02)            |
|                        | 7              | 3.32 (0.10)                 | 0.48 (0.37) | 0.24 (0.37) | 0.15 (0.06)            | 299 (0.10)            |
|                        | 8              | 3.88 (0.06)                 | 1.50 (0.32) | 0.36 (0.32) | 0.27 (0.15)            | 404 (0.01)            |

(c) NC 1859 – F59PH Locomotive

| Fuel                   | Notch Position | NO as NO <sub>2</sub> (g/s) | HC (g/s)    | CO (g/s)    | Opacity-based PM (g/s) | CO <sub>2</sub> (g/s) |
|------------------------|----------------|-----------------------------|-------------|-------------|------------------------|-----------------------|
| ULSD<br>(6 replicates) | Low Idle       | 0.16 (0.11)                 | 0.05 (1.13) | 0.02 (1.13) | 0.02 (0.08)            | 7.73 (0.24)           |
|                        | High Idle      | 0.22 (0.11)                 | 0.22 (0.82) | 0.09 (0.82) | 0.02 (0.11)            | 13.4 (0.18)           |
|                        | Dynamic Brake  | 0.24 (0.08)                 | 0.18 (1.03) | 0.08 (1.03) | 0.02 (0.09)            | 15.5 (0.15)           |
|                        | 1              | 0.45 (0.10)                 | 0.22 (0.60) | 0.09 (0.60) | 0.03 (0.08)            | 27.7 (0.18)           |
|                        | 2              | 0.70 (0.03)                 | 0.15 (0.63) | 0.10 (0.63) | 0.04 (0.09)            | 41.7 (0.09)           |
|                        | 3              | 1.27 (0.03)                 | 0.30 (1.64) | 0.22 (1.64) | 0.06 (0.10)            | 81.4 (0.08)           |
|                        | 4              | 1.77 (0.06)                 | 0.16 (0.73) | 0.12 (0.73) | 0.09 (0.17)            | 110 (0.07)            |
|                        | 5              | 2.24 (0.03)                 | 0.17 (0.98) | 0.14 (0.98) | 0.12 (0.13)            | 162 (0.05)            |
|                        | 6              | 2.68 (0.08)                 | 0.22 (0.68) | 0.19 (0.68) | 0.17 (0.29)            | 201 (0.08)            |
|                        | 7              | 2.87 (0.07)                 | 0.23 (0.97) | 0.19 (0.97) | 0.22 (0.25)            | 263 (0.09)            |
|                        | 8              | 3.66 (0.04)                 | 1.87 (0.11) | 0.66 (0.11) | 0.33 (0.13)            | 365 (0.01)            |

| Fuel                   | Notch Position | NO as NO <sub>2</sub> (g/s) | HC (g/s)    | CO (g/s)    | Opacity-based PM (g/s) | CO <sub>2</sub> (g/s) |
|------------------------|----------------|-----------------------------|-------------|-------------|------------------------|-----------------------|
| B10<br>(6 replicates)  | Low Idle       | 0.14 (0.24)                 | 0.15 (0.47) | 0.07 (0.47) | 0.01 (0.20)            | 8.36 (0.21)           |
|                        | High Idle      | 0.21 (0.19)                 | 0.20 (0.37) | 0.09 (0.37) | 0.01 (0.18)            | 16.8 (0.05)           |
|                        | Dynamic Brake  | 0.23 (0.22)                 | 0.22 (0.36) | 0.10 (0.36) | 0.01 (0.19)            | 20.9 (0.47)           |
|                        | 1              | 0.41 (0.21)                 | 0.09 (0.63) | 0.08 (0.63) | 0.01 (0.20)            | 32.0 (0.05)           |
|                        | 2              | 0.61 (0.23)                 | 0.09 (0.71) | 0.08 (0.71) | 0.02 (0.19)            | 45.8 (0.07)           |
|                        | 3              | 1.23 (0.23)                 | 0.11 (0.50) | 0.09 (0.50) | 0.02 (0.17)            | 86.0 (0.04)           |
|                        | 4              | 1.66 (0.24)                 | 0.11 (0.66) | 0.10 (0.66) | 0.03 (0.21)            | 121 (0.01)            |
|                        | 5              | 2.13 (0.24)                 | 0.15 (0.61) | 0.13 (0.61) | 0.04 (0.17)            | 161 (0.03)            |
|                        | 6              | 2.61 (0.22)                 | 0.16 (0.55) | 0.13 (0.55) | 0.05 (0.14)            | 201 (0.03)            |
|                        | 7              | 3.28 (0.20)                 | 0.23 (0.85) | 0.13 (0.83) | 0.12 (0.19)            | 284 (0.03)            |
|                        | 8              | 3.62 (0.20)                 | 0.64 (0.50) | 0.23 (0.50) | 0.19 (0.20)            | 351 (0.05)            |
| B20<br>(15 replicates) | Low Idle       | 0.13 (0.78)                 | 0.10 (0.76) | 0.09 (0.45) | 0.02 (0.47)            | 7.24 (0.11)           |
|                        | High Idle      | 0.33 (0.26)                 | 0.16 (0.90) | 0.15 (0.35) | 0.02 (0.53)            | 22.9 (0.18)           |
|                        | Dynamic Brake  | 0.21 (0.30)                 | 0.16 (0.77) | 0.14 (0.36) | 0.02 (0.53)            | 14.8 (0.10)           |
|                        | 1              | 0.40 (0.41)                 | 0.07 (0.75) | 0.12 (0.35) | 0.02 (0.52)            | 29.1 (0.08)           |
|                        | 2              | 0.60 (0.52)                 | 0.07 (0.96) | 0.11 (0.58) | 0.03 (0.49)            | 41.9 (0.08)           |
|                        | 3              | 1.17 (0.54)                 | 0.08 (0.89) | 0.14 (0.64) | 0.03 (0.44)            | 79.6 (0.05)           |
|                        | 4              | 1.60 (0.57)                 | 0.07 (0.69) | 0.12 (0.57) | 0.05 (0.38)            | 112 (0.05)            |
|                        | 5              | 2.09 (0.55)                 | 0.10 (0.88) | 0.18 (0.85) | 0.06 (0.43)            | 156 (0.04)            |
|                        | 6              | 2.49 (0.40)                 | 0.10 (1.05) | 0.17 (0.63) | 0.06 (0.39)            | 186 (0.04)            |
|                        | 7              | 3.27 (0.30)                 | 0.19 (0.91) | 0.26 (0.65) | 0.14 (0.36)            | 287 (0.06)            |
|                        | 8              | 3.60 (0.31)                 | 0.54 (1.36) | 0.34 (0.42) | 0.18 (0.18)            | 355 (0.04)            |



| <b>Fuel</b>               | <b>Notch Position</b> | <b>NO as NO<sub>2</sub> (g/s)</b> | <b>HC (g/s)</b>    | <b>CO (g/s)</b>    | <b>Opacity-based PM (g/s)</b> | <b>CO<sub>2</sub> (g/s)</b> |
|---------------------------|-----------------------|-----------------------------------|--------------------|--------------------|-------------------------------|-----------------------------|
| B40<br><br>(6 replicates) | Low Idle              | 0.15 <i>(0.12)</i>                | 0.07 <i>(0.26)</i> | 0.05 <i>(0.26)</i> | 0.02 <i>(0.07)</i>            | 7.10 <i>(0.06)</i>          |
|                           | High Idle             | 0.24 <i>(0.08)</i>                | 0.09 <i>(0.29)</i> | 0.07 <i>(0.26)</i> | 0.01 <i>(0.20)</i>            | 13.9 <i>(0.30)</i>          |
|                           | Dynamic Brake         | 0.25 <i>(0.12)</i>                | 0.11 <i>(0.27)</i> | 0.08 <i>(0.27)</i> | 0.01 <i>(0.08)</i>            | 14.8 <i>(0.11)</i>          |
|                           | 1                     | 0.45 <i>(0.14)</i>                | 0.06 <i>(0.41)</i> | 0.07 <i>(0.40)</i> | 0.02 <i>(0.11)</i>            | 25.6 <i>(0.10)</i>          |
|                           | 2                     | 0.61 <i>(0.16)</i>                | 0.05 <i>(0.38)</i> | 0.05 <i>(0.45)</i> | 0.02 <i>(0.14)</i>            | 35.3 <i>(0.14)</i>          |
|                           | 3                     | 1.39 <i>(0.09)</i>                | 0.07 <i>(0.48)</i> | 0.08 <i>(0.48)</i> | 0.03 <i>(0.05)</i>            | 77.7 <i>(0.06)</i>          |
|                           | 4                     | 1.90 <i>(0.07)</i>                | 0.07 <i>(0.27)</i> | 0.09 <i>(0.27)</i> | 0.05 <i>(0.08)</i>            | 110 <i>(0.05)</i>           |
|                           | 5                     | 2.53 <i>(0.04)</i>                | 0.08 <i>(0.51)</i> | 0.11 <i>(0.51)</i> | 0.06 <i>(0.09)</i>            | 152 <i>(0.06)</i>           |
|                           | 6                     | 3.05 <i>(0.05)</i>                | 0.09 <i>(0.41)</i> | 0.11 <i>(0.41)</i> | 0.06 <i>(0.06)</i>            | 195 <i>(0.05)</i>           |
|                           | 7                     | 3.81 <i>(0.07)</i>                | 0.26 <i>(0.37)</i> | 0.23 <i>(0.35)</i> | 0.10 <i>(0.12)</i>            | 271 <i>(0.07)</i>           |
|                           | 8                     | 4.43 <i>(0.07)</i>                | 0.72 <i>(0.26)</i> | 0.32 <i>(0.26)</i> | 0.15 <i>(0.10)</i>            | 362 <i>(0.04)</i>           |

Italicized values in parentheses are coefficients of variation (standard deviation divided by the mean) on the mean emission rate.

NO<sub>x</sub> includes NO and NO<sub>2</sub>. Only NO was measured. Results include multiplicative correction factors based on NO and NO<sub>2</sub> measurements of the prime mover engines in the rail yard with a SEMTECH-DS PEMS, temperature, and humidity.

HC is measured using non-dispersive infrared (NDIR), which accurately measures some compounds but responds only partially to others. Results include multiplicative correction factors based on FID measurements of the prime mover engines in the rail yard with a SEMTECH-DS PEMS.

Opacity is measured using a light scattering technique, which provides useful relative comparisons of particle levels in the exhaust. Results include multiplicative correction factor of 5 to approximate total PM.

**Table S12. Time-Based Cycle Average Emission Rates from Over-the-Rail Measurement of Prime Mover Engines**

| Locomotive                    | Fuel | Cycle Average Emission Rate (g/s) |                 |             |                 |                 |  |
|-------------------------------|------|-----------------------------------|-----------------|-------------|-----------------|-----------------|--|
|                               |      | NO <sub>x</sub> <sup>a</sup>      | HC <sup>b</sup> | CO          | PM <sup>c</sup> | CO <sub>2</sub> |  |
| NC 1797<br>(F59PHI)           | ULSD | 3.61 (0.05)                       | 0.53 (0.21)     | 0.77 (0.46) | 0.04 (0.09)     | 98.3 (0.09)     |  |
|                               | B10  | 3.22 (0.13)                       | 0.26 (0.45)     | 0.61 (0.32) | 0.04 (0.10)     | 108 (0.05)      |  |
|                               | B20  | 3.25 (0.15)                       | 0.09 (0.36)     | 0.45 (0.34) | 0.03 (0.13)     | 93.4 (0.09)     |  |
|                               | B40  | 4.34 (0.13)                       | 0.45 (0.32)     | 0.92 (0.31) | 0.05 (0.30)     | 105 (0.04)      |  |
| NC 1810<br>(F59PH)            | ULSD | 1.80 (0.15)                       | 1.38 (0.22)     | 0.83 (0.32) | 0.06 (0.09)     | 110 (0.05)      |  |
|                               | B10  | 1.63 (0.10)                       | 2.42 (0.22)     | 0.25 (1.33) | 0.10 (0.07)     | 104 (0.05)      |  |
|                               | B20  | 1.81 (0.12)                       | 0.81 (0.20)     | 0.18 (0.30) | 0.06 (0.17)     | 97.7 (0.10)     |  |
|                               | B40  | 1.26 (0.20)                       | 0.52 (0.29)     | 0.03 (0.36) | 0.06 (0.09)     | 96.1 (0.08)     |  |
|                               | B60  | 2.18 (0.14)                       | 0.75 (0.37)     | 0.32 (0.60) | 0.10 (0.42)     | 100 (0.10)      |  |
|                               | B80  | 1.84 (0.26)                       | 0.54 (0.49)     | 0.46 (0.37) | 0.06 (0.12)     | 101 (0.09)      |  |
|                               | B100 | 1.91 (0.13)                       | 0.72 (0.35)     | 0.57 (0.26) | 0.06 (0.14)     | 110 (0.05)      |  |
| NC 1859<br>(F59PH)            | ULSD | 1.90 (0.09)                       | 0.90 (0.21)     | 0.88 (0.71) | 0.09 (0.14)     | 97.9 (0.06)     |  |
|                               | B10  | 1.70 (0.24)                       | 0.32 (0.48)     | 0.71 (0.31) | 0.05 (0.16)     | 102 (0.02)      |  |
|                               | B20  | 1.65 (0.11)                       | 0.26 (0.79)     | 0.62 (0.78) | 0.05 (0.22)     | 98.8 (0.08)     |  |
|                               | B40  | 2.05 (0.12)                       | 0.32 (0.33)     | 0.38 (0.35) | 0.04 (0.07)     | 98.8 (0.04)     |  |
| Fleet<br>Average <sup>d</sup> | ULSD | 2.44 (9%)                         | 0.94 (10%)      | 0.83 (12%)  | 0.06 (9%)       | 102 (2%)        |  |
|                               | B10  | 2.18 (9%)                         | 1.00 (25%)      | 0.52 (14%)  | 0.06 (11%)      | 105 (1%)        |  |
|                               | B20  | 2.24 (7%)                         | 0.39 (18%)      | 0.42 (16%)  | 0.05 (8%)       | 96.6 (2%)       |  |
|                               | B40  | 2.55 (13%)                        | 0.43 (9%)       | 0.45 (22%)  | 0.05 (6%)       | 100 (2%)        |  |

Italicized values in parentheses for each locomotive are coefficients of variation (standard deviation divided by the mean) on the mean emission rate. For the fleet average emission rates, the italicized values in parentheses are relative standard errors (standard error divided by the mean). Fleet average emission rate means and standard errors derived from one sample weighted t-tests.

<sup>a</sup> NO<sub>x</sub> includes NO and NO<sub>2</sub>. Only NO was measured. Results include multiplicative correction factors based on NO and NO<sub>2</sub> measurements of the prime mover engines in the rail yard with a SEMTECH-DS PEMS, temperature, and humidity.

<sup>b</sup> HC is measured using non-dispersive infrared (NDIR), which accurately measures some compounds but responds only partially to others. Results include multiplicative correction factors based on FID measurements of the prime mover engines in the rail yard with a SEMTECH-DS PEMS.

<sup>c</sup> Opacity is measured using a light scattering technique, which provides useful relative comparisons of particle levels in the exhaust. Results include multiplicative correction factor of 5 to approximate total PM.

<sup>d</sup> Fleet average emission rates based on equal weighting of each locomotive.

### ***Discussion: Evaluation of intra- and inter-locomotive trends in PM measurement results***

With regard to the possibility of some experimental artifact, particularly with respect to PM emission rates, which seem to be highly variable especially for NC 1810, we consider an engineering perspective. The same measurement procedures were used for all locomotives for all rail yard (RY) measurements, and the same procedures were used for all locomotives for all over-the-rail (OTR) measurements. The order of measurements was somewhat randomized, in that measurements of one locomotive were interspersed with those of another locomotive in terms of the order in which the measurements were done. Thus, if there were, say, some random error introduced by the measurement method, it should manifest across the board. However, in contrast, we see distinctive patterns for each of the three locomotives with regard to PM emissions. This suggests that the measurement method was unlikely to be the source of the patterns in the data.

We note that the comparison of PM emission rates for biofuel blends to ULSD is approximately consistent (similar percentage differences) for OTR and RY measurements for NC 1859. For NC 1797, both OTR and RY measurements indicate that the most favorable comparison is for B20. For NC 1810, the results are highly variable for both rail yard and over-the-rail. NC 1810 tends to be a higher PM emitter than the other two locomotives.

For NC 1810, the RY notch average PM emission rates (shown in Table S7 of the Supporting Information) are internally consistent for each fuel blend in that they are lowest at low engine load and increase with increasing engine load. The notch average PM emission rates are 0.10 g/sec or lower for Idle through Notch 5 for all fuel blends. There are large variations in the Notch 8 average emission rates: 0.28 g/sec for ULSD, 0.26 g/sec for B10, 0.11 g/sec for B20, 0.43 g/sec for B40, 0.18 g/sec for B60, 0.46 g/sec for B80, and 0.30 g/sec for B100. The cycle average rates (shown in Table S8 of the Supporting Information) for these cases fluctuate between 0.03 g/sec (B20) to 0.11 g/s (B80). In contrast, the RY cycle average PM emission rates vary only between 0.03 g/sec and 0.04 g/sec for NC 1797 and between 0.04 g/sec and 0.07 g/sec for NC 1859. Thus, NC 1810 is a higher emitting and “noisier” locomotive, with more inherent variability in emission rates than for the other two engines. However, for individual measurements, the trends in emission rates versus engine load are reasonable.

For the OTR measurements, we find that the trend in PM emission rate versus engine load is also as expected for each fuel blend in that it increases with increasing engine load. There are large variations in the Notch 8 emission rates (shown in Table S10 in the Supporting Information): 0.25 g/sec for ULSD, 0.38 g/sec for B10, 0.21 g/sec for B20, 0.23 g/sec for B40, 0.39 g/sec for B60, 0.25 g/sec for B80, and 0.27 g/sec for B100. Similar to the RY results, the OTR cycle average rates are more variable for NC 1810 than for the other two locomotives. For example, the NC 1810 cycle average emission rates vary from 0.06 g/sec to 0.10 g/sec among the fuel blends, which is generally higher than for the other two locomotives. NC 1859 cycle average rates vary between 0.04 g/sec to 0.09 g/sec among the fuel blends, whereas NC 1979 cycle average rates vary only between 0.03 g/sec and 0.05 g/sec. Thus, for both the OTR and RY results, NC 1810 typically has higher PM emission rates and more variability in the PM emissions rates.

Given that consistent results were obtained when comparing OTR vs. RY in terms of engine operational parameters, and that the PM emission rates follow the expected trend with engine load for each individual measurement, it seems likely that the observed variability in emission rates is related to the engine itself (or the characteristics of its emissions).

Our experience is that there can be considerable inter-engine variability in emission rates, and in comparisons of fuels, when comparing engines of the same make and model. We have seen this in prior studies of highway vehicles (17-18).

## Lube Oil Analysis Results

As a part of the 90-day inspection of each locomotive in the NCDOT fleet, oil samples are taken from the prime mover engines and sent to a fluid analysis laboratory. These fluid analyses characterize wear metals present in the oil, as well as oil condition. Each set of lubricating oil analyses is given one of three color-coded conclusions: (1) Green: No Action Required; (2) Yellow: Monitor; and (3) Red: Action Required.

According to a member of the fluid analysis laboratory, these color-coded conclusions are based on trends among wear metals over previous samples. There are not any specific criteria that determine the conclusions made; the conclusions are based on the discretion of the laboratory analyst. In general, there are ranges in metal concentrations that the laboratory analyst looks for to determine whether engine wear may be present. However, these concentration ranges are proprietary and not available to the public.

It is apparent that, over time, most of the locomotives in the NCDOT fleet have had oil analyses come back with recommendations from the laboratory to monitor (yellow) or take action on (red) the lubricating oil. Based on the comments given on the oil analysis reports, the four wear metals that lead to results being coded yellow or red are copper (Cu), iron (Fe), tin (Sn), and Lead (Pb). In order to assess the trends of these four wear metals over time for each engine, reported concentrations were graphed. For the oil analysis that return coded yellow or red, an increasing trend in the concentration of one or more of these wear metals is observed.

**Table S13. Summary of Oil Analyses of Prime Mover Engines in NCDOT Locomotive Fleet**  
(a) NC 1797 (F59PHI)

| Date      | Summary                                                                                                                                                                                                                              | Fuel    |
|-----------|--------------------------------------------------------------------------------------------------------------------------------------------------------------------------------------------------------------------------------------|---------|
| 9/1/2010  | No Action Required                                                                                                                                                                                                                   | ULSD    |
| 12/8/2010 | No Action Required                                                                                                                                                                                                                   | ULSD    |
| 3/14/2011 | No Action Required                                                                                                                                                                                                                   | ULSD    |
| 8/6/2012  | Monitor: Wear metals and oil additives have changed a great deal; silicon levels may indicate some dirt entry or may be residue from a recent repair; iron, tin, and lead have increase and may indicate some crank and bearing wear | ULSD    |
| 8/15/2012 | Action Required: Copper, iron, tin, and lead have increased and may indicate some crank and bearing wear                                                                                                                             | ULSD    |
| 2/14/2013 | Action Required: Copper, lead and tin remains elevated. Possible bearing wear.                                                                                                                                                       | ULSD    |
| 5/7/2013  | Action Required: Copper, lead and tin are increasing. Possible bearing wear.                                                                                                                                                         | ULSD    |
| 5/15/2013 | Action Required: Copper, lead and tin are increasing. Possible bearing wear.                                                                                                                                                         | ULSD    |
| 8/6/2013  | Action Required: Copper, lead and tin remain elevated. Possible bearing wear.                                                                                                                                                        | ULSD    |
| 11/8/2013 | No Action Required                                                                                                                                                                                                                   | ULSD    |
| 2/12/2014 | No Action Required                                                                                                                                                                                                                   | ULSD    |
| 5/9/2014  | Monitor: Lead and tin are elevated. Possible bearing wear.                                                                                                                                                                           | B40     |
| 8/28/2014 | Monitor: Copper, lead, and tin are elevated. Possible bearing wear.                                                                                                                                                                  | B10/B20 |

## (b) NC 1810 (F59PH)

| Date       | Summary                                                                                  | Fuel        |
|------------|------------------------------------------------------------------------------------------|-------------|
| 12/21/2010 | No Action Required                                                                       | ULSD        |
| 8/21/2011  | No Action Required                                                                       | ULSD        |
| 3/8/2012   | No Action Required                                                                       | ULSD        |
| 6/4/2012   | No Action Required                                                                       | ULSD        |
| 8/15/2012  | Monitor: Iron and lead continue to increase and may indicate some crank and bearing wear | B10         |
| 2/22/2013  | No Action Required                                                                       | B10/B20/B40 |
| 9/8/2013   | No Action Required                                                                       | B20/B60     |
| 1/14/2014  | No Action Required                                                                       | B60/B80     |
| 3/10/2014  | No Action Required                                                                       | B100/ULSD   |
| 6/12/2014  | No Action Required                                                                       | ULSD        |

## (c) NC 1859 (F59PH)

| Date       | Summary                                                                                  | Fuel     |
|------------|------------------------------------------------------------------------------------------|----------|
| 12/20/2011 | Monitor: Copper, tin, and lead are higher than normal and may indicate some bearing wear | ULSD     |
| 3/18/2012  | Monitor: No significant increase in wear detected                                        | ULSD     |
| 6/19/2012  | No Action Required                                                                       | ULSD     |
| 9/14/2012  | No Action Required                                                                       | ULSD     |
| 12/25/2012 | No Action Required                                                                       | ULSD     |
| 3/27/2013  | No Action Required                                                                       | ULSD     |
| 6/29/2013  | No Action Required                                                                       | ULSD     |
| 9/21/2013  | No Action Required                                                                       | ULSD/B40 |
| 12/31/2013 | No Action Required                                                                       | B20/B40  |
| 3/24/2014  | No Action Required                                                                       | ULSD     |
| 6/25/2014  | No Action Required                                                                       | ULSD     |

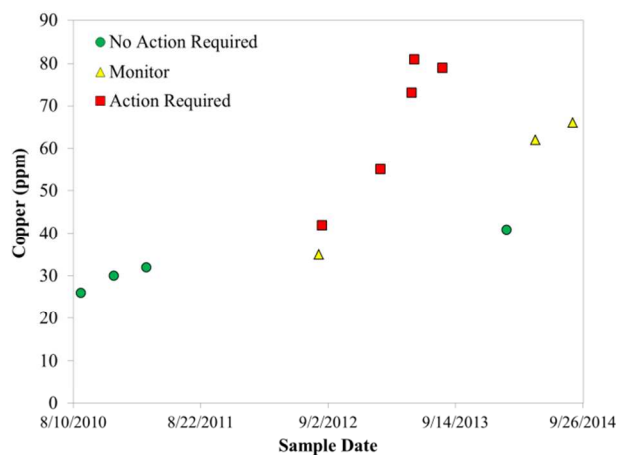

(a) Copper (Cu)

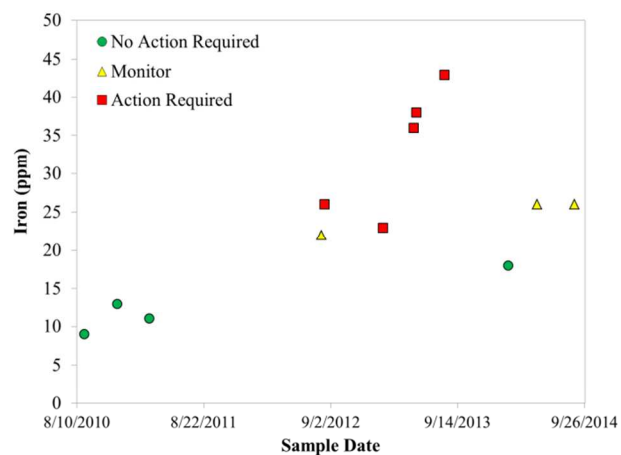

(b) Iron (Fe)

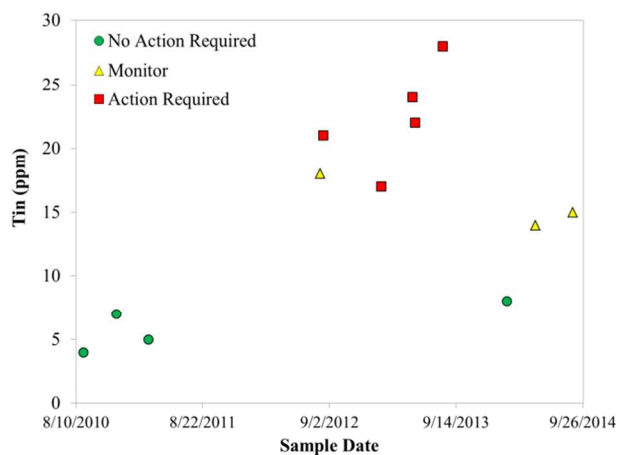

(c) Tin (Sn)

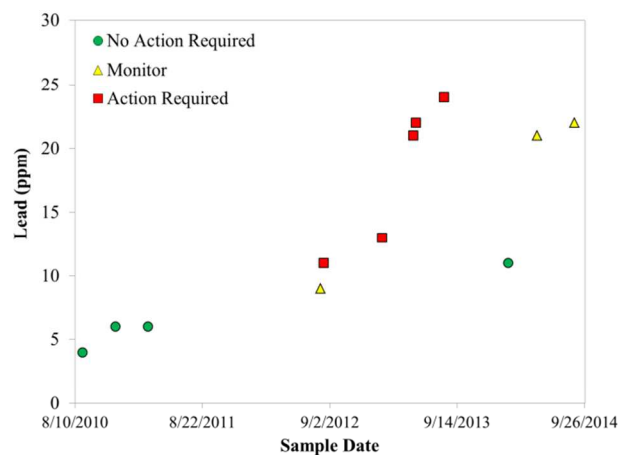

(d) Lead (Pb)

**Figure S13. Wear Metal Concentrations in Oil Samples from NC 1797 Prime Mover Engine**

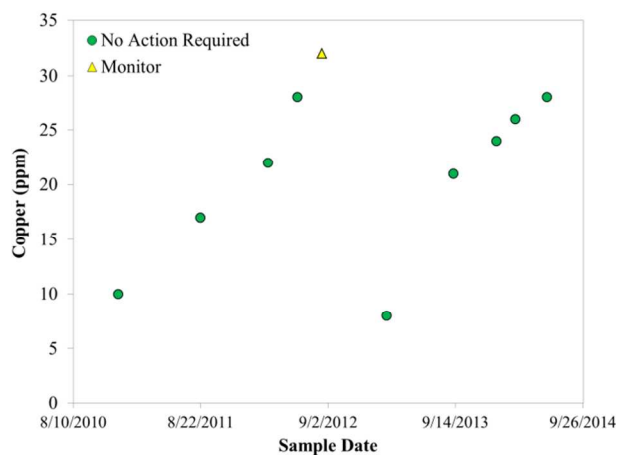

(a) Copper (Cu)

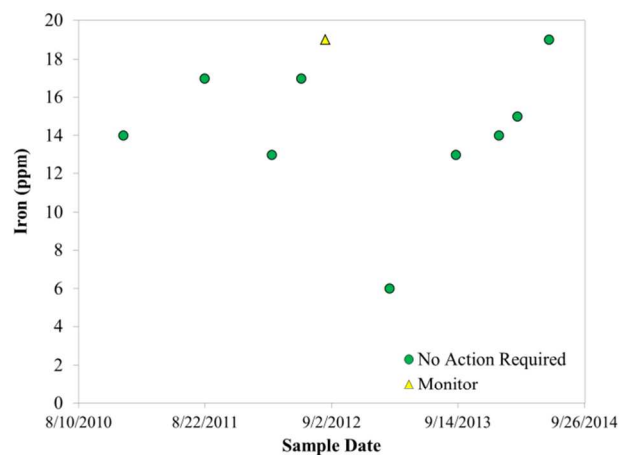

(b) Iron (Fe)

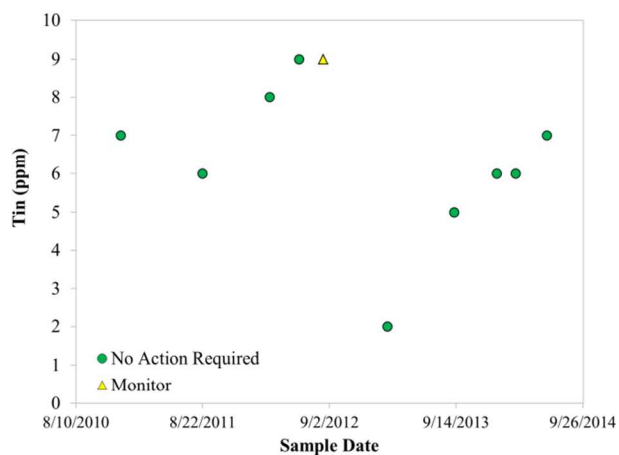

(c) Tin (Sn)

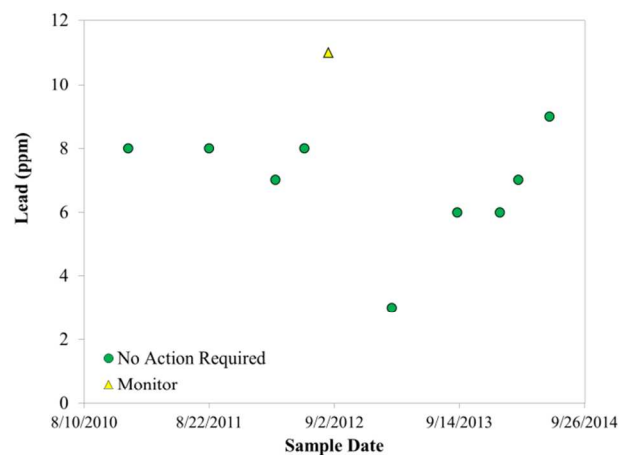

(d) Lead (Pb)

**Figure S14. Wear Metal Concentrations in Oil Samples from NC 1810 Prime Mover Engine**



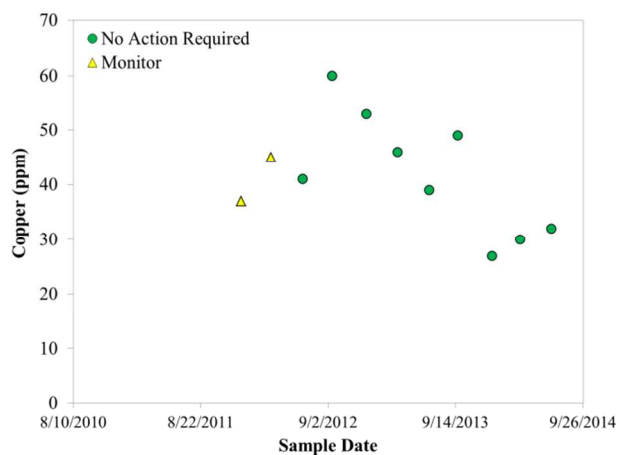

(a) Copper (Cu)

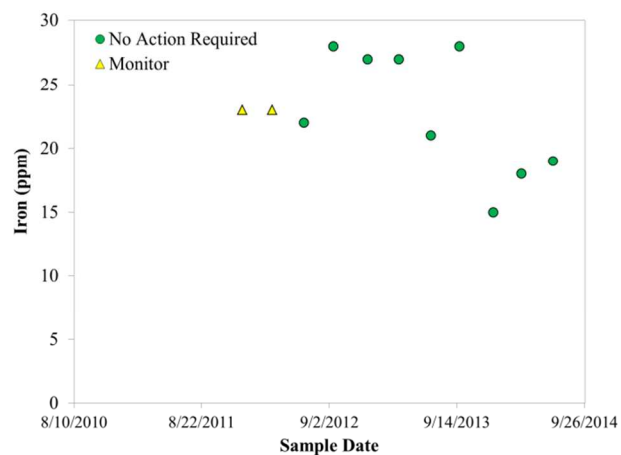

(b) Iron (Fe)

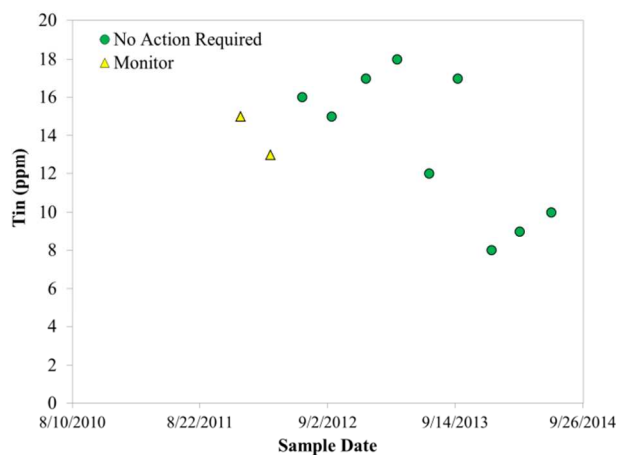

(c) Tin (Sn)

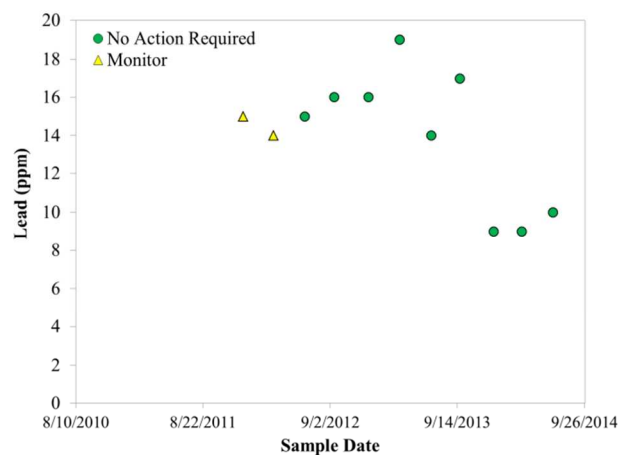

(d) Lead (Pb)

**Figure S15. Wear Metal Concentrations in Oil Samples from NC 1859 Prime Mover Engine**

## References

1. OEM-2100 Montana System Operation Manual; Clean Air Technologies International, Inc.: Buffalo, NY, 2003.
2. OEM-2100AX Axion System Operation Manual; Clean Air Technologies International, Inc.: Buffalo, NY, 2008.
3. Vojtisek-Lom, M.; Allsop, J.E. *Development of Heavy-Duty Diesel Portable, On-Board Mass Exhaust Emissions Monitoring System with NO<sub>x</sub>, CO<sub>2</sub>, and Qualitative PM Capabilities*; Report 2001-01-3641; Society of Automotive Engineers: Warrenton, PA, 2001.
4. Andros, Inc. "Concentrations Measurement and Span Calibration Using n-Hexane and Propane in the ANDROS 6602/6800 Automotive Exhaust Gas Analyzer"; <http://www.andros.com/hmDownloads.htm>, accessed January 2007.
5. Frey, H.C.; Unal, A.; Roupail, N.M.; Colyar, J.D. On-Road Measurement of Vehicle Tailpipe Emissions Using a Portable Instrument. *J. Air Waste Manage. Assoc.* **2003**, 53(8): 992-1002.
6. Unal, A.; Frey, H.C.; Roupail, N.M. Quantification of Highway Vehicle Emissions Hot Spots Based upon On-Board Measurements; *J. Air Waste Manage. Assoc.* **2004**, 54(2), 130-140.
7. Zhang, K. *Micro-Scale On-Road Vehicle-Specific Emissions Measurements and Modeling*; PhD Dissertation, Department of Civil, Construction, and Environmental Engineering, North Carolina State University: Raleigh, NC, **2006**.
8. Myers, J; Kelly, T; Dindal, A; Willenberg, Z; Riggs, K. *Environmental Technology Verification Report: Clean Air Technologies International, Inc. REMOTE On-Board Emissions Monitor*; Prepared for U.S. Environmental Protection Agency: Research Triangle Park, NC, 2003.
9. Singer, B.C.; Harley, D.A.; Littlejohn, D.; Ho, J.; Vo, T. Scaling of Infrared Remote Sensor Hydrocarbon Measurements for Motor Vehicle Emission Inventory Calculations. *Environ. Sci. Technol.* **1998**, 32(21), 3241-3248.
10. Stephens, R.D.; Mulawa, P.A.; Giles, M.T.; Kennedy, K.G.; Groblicki, P.J.; Cadle, S.H.; Knapp, K.T. An experimental evaluation of remote sensing-based hydrocarbon measurements: A comparison to FID measurements. *J. Air Waste Manage. Assoc.* **1996**, 46(2): 148-158.
11. Stephens, R.D.; Cadle, S.H.; Qian, T.Z. Analysis of Remote Sensing Errors of Commission and Omission under FTP Conditions. *J. Air Waste Manage. Assoc.* **1996**, 46(6), 510-516.

12. Durbin, T.D.; Johnson, K.; Cocker, D.R.; Miller, J.W. Evaluation and Comparison of Portable Emissions Measurement Systems and Federal Reference Methods for Emissions from a Back-Up Generator and a Diesel Truck Operated on a Chassis Dynamometer. *Environ. Sci. Technol.* **2007**, *41*(17): 6199-6204.
13. Vojtisek-Lom, M.; Cobb, J.T. Vehicle Mass Emissions Measurement using a Portable 5-Gas Exhaust Analyzer and Engine Computer Data. *Proc. EPA A&WMA Emiss. Inventory Conf.* **1997**, 656-669.
14. *Engine Air Filtration for Light, Medium & Heavy Dust Conditions*. Donaldson Filtration Solutions <http://www.donaldson.com/en/catalogs/engine/057643.pdf>. Accessed July 3, 2012.
15. Pang, S.; Frey, H.C.; Rasdorf, W.J. (2009) Life Cycle Inventory Energy Consumption and Emission for Biodiesel versus Petroleum Diesel Fueled Construction Vehicles. *Environ. Sci. Technol.*, **43**(16): 6398-6405.
16. Lindhjem, C.; Chan, L.M.; Pollack, A.; Kite, C. "Applying Humidity and Temperature Corrections to On and Off-Road Mobile Source Emissions." *Proc. 13<sup>th</sup> International Emiss. Inventory Conf.* **2003**.
17. Frey, H.C.; Kim, K. (2006). "Comparison of Real-World Fuel Use and Emissions for Dump Trucks Fueled with B20 Biodiesel Versus Petroleum Diesel." *Transp. Res. Rec.*, **1987**: 110-117.
18. Frey, H.C.; Kim, K. (2009). "In-use measurement of the activity, fuel use, and emissions of eight cement mixer trucks operated on each of petroleum diesel and soy-based B20 biodiesel." *Transp. Res. Part D*, **14**: 585-592.
